# Supplementary material for: Planar tetracoordinate fluorine atoms
Source: PubMed Central journal article supplement — Chem Sci. 2021 Apr 8;12(19):6699–704. doi: 10.1039/d1sc01325d (PMC8132929; doi:10.1039/d1sc01325d), 2021-04-08
Supplement: SC-012-D1SC01325D-s001.pdf [file SC-012-D1SC01325D-s001.pdf]

## Supplementary Information

### Planar Tetracoordinate Fluorine Atoms

Gabriela Castillo-Toraya,<sup>1</sup> Mesías Orozco-Ic,<sup>1</sup> Eugenia Dzib,<sup>1</sup> Ximena Zarate,<sup>2</sup> Filiberto  
Ortíz-Chi,<sup>3</sup> Zhong-hua Cui,<sup>4</sup> Jorge Barroso,<sup>1,\*</sup> Gabriel Merino.<sup>1,\*</sup>

<sup>1</sup> *Departamento de Física Aplicada, Centro de Investigación y de Estudios Avanzados,  
Unidad Mérida, Mérida, Yucatán, México.*

<sup>2</sup> *Instituto de Ciencias Químicas Aplicadas, Facultad de Ingeniería, Universidad Autónoma de  
Chile, Santiago, Chile.*

<sup>3</sup> *CONACYT-Universidad Juárez Autónoma de Tabasco, Centro de Investigación de Ciencia y  
Tecnología Aplicada de Tabasco, Cunduacán 86690, Tabasco, México.*

<sup>4</sup> *Institute of Atomic and Molecular Physics, Key Laboratory of Physics and Technology for  
Advanced Batteries (Ministry of Education), Jilin University, Changchun 130012, China.*

E-mail: [gmerino@cinvestav.mx](mailto:gmerino@cinvestav.mx)

[jorge.barroso@cinvestav.mx](mailto:jorge.barroso@cinvestav.mx)

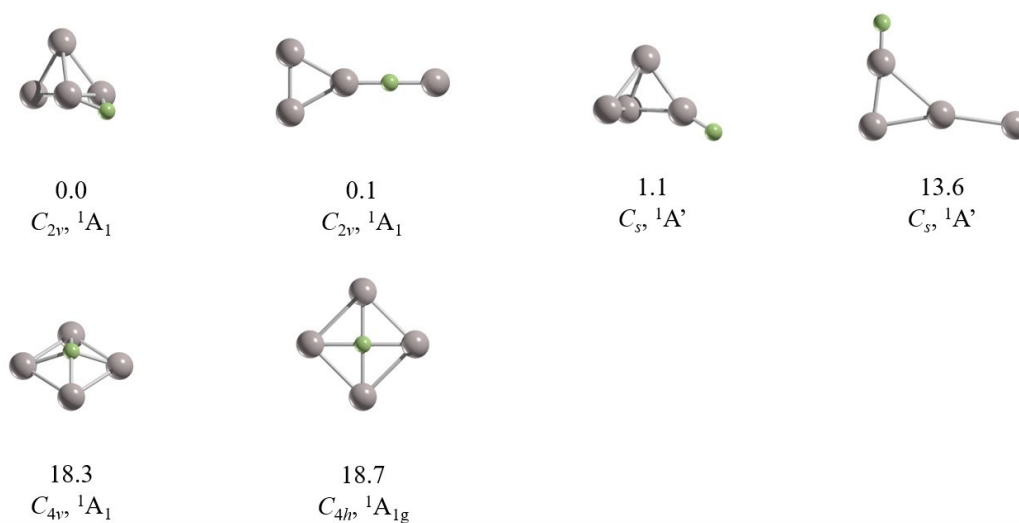

**Figure S1.** TPSS-D3(BJ)/def2-TZVP structures of the lowest-energy isomers of  $FAl_4^+$ . Relative energies in kcal/mol were computed at the CCSD(T)/def2-TZVP//TPSS-D3(BJ)/def2-TZVP level, including the ZPE correction at the TPSS-D3(BJ)/def2-TZVP level.

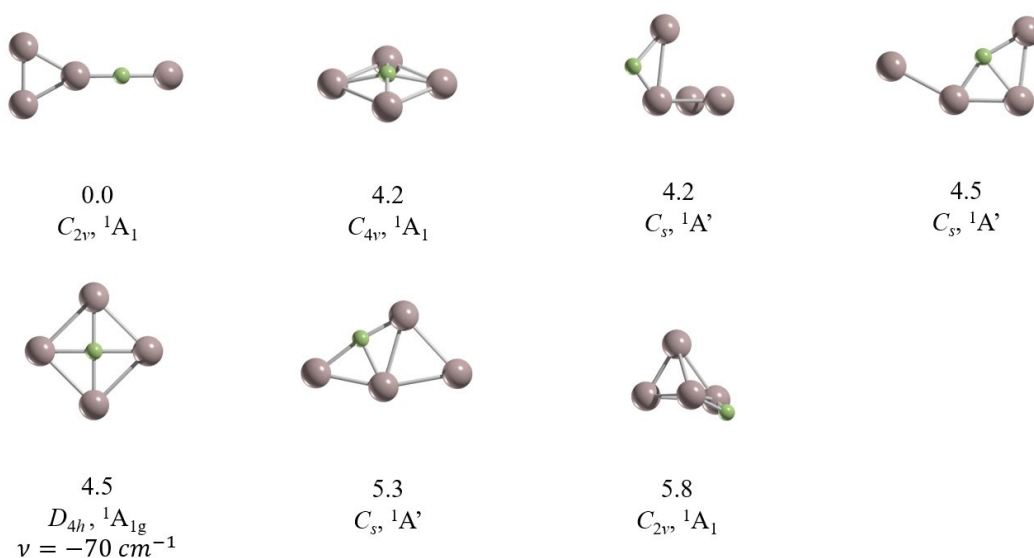

**Figure S2.** TPSS-D3(BJ)/def2-TZVP structures of the lowest-energy isomers of  $FGa_4^+$ . Relative energies in kcal/mol were computed at the CCSD(T)/def2-TZVP//TPSS-D3(BJ)/def2-TZVP level, including the ZPE correction at the TPSS-D3(BJ)/def2-TZVP level.

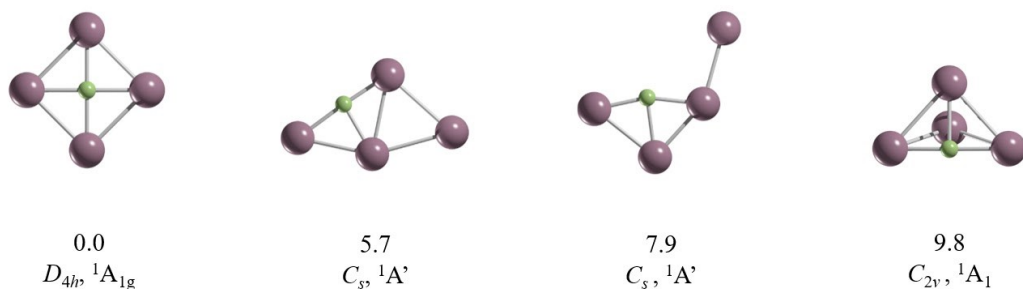

**Figure S3.** TPSS-D3(BJ)/def2-TZVP structures of the lowest-energy isomers of  $\text{FIn}_4^+$ . Relative energies in kcal/mol were computed at the CCSD(T)/def2-TZVP//TPSS-D3(BJ)/def2-TZVP level, including the ZPE correction at the TPSS-D3(BJ)/def2-TZVP level.

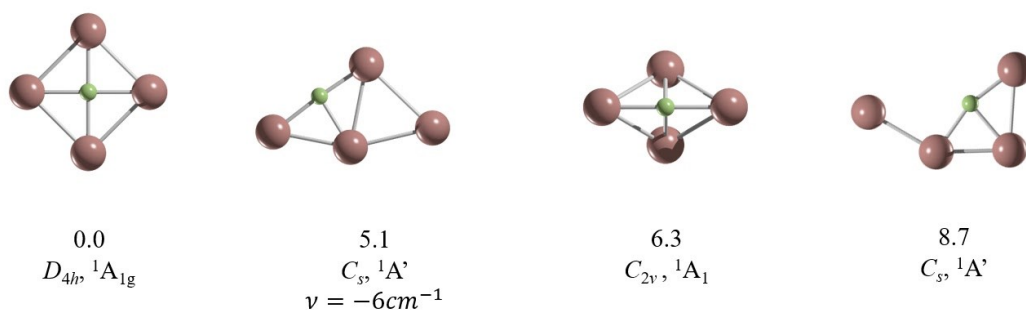

**Figure S4.** TPSS-D3(BJ)/def2-TZVP structures of the lowest-energy isomers of  $\text{FTl}_4^+$ . Relative energies in kcal/mol were computed at the CCSD(T)/def2-TZVP//TPSS-D3(BJ)/def2-TZVP level, including the ZPE correction at the TPSS-D3(BJ)/def2-TZVP level.

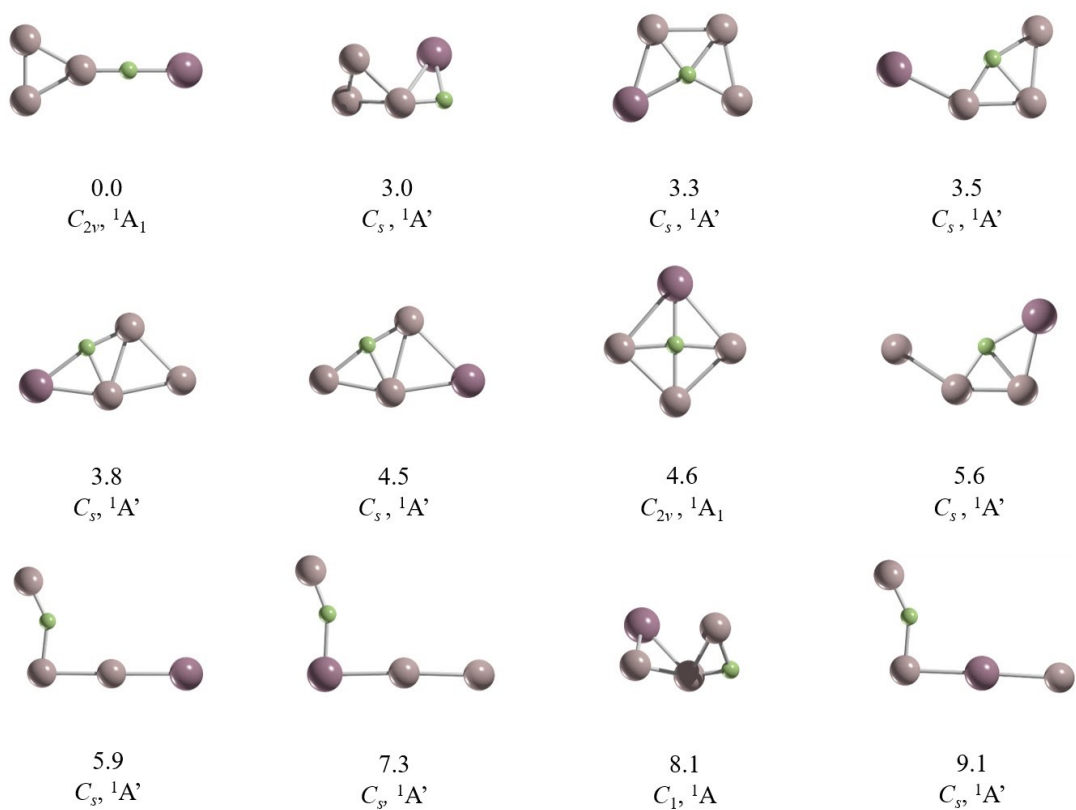

**Figure S5.** TPSS-D3(BJ)/def2-TZVP structures of the lowest-energy isomers of  $FGa_3In^+$ . Relative energies in kcal/mol were computed at the CCSD(T)/def2-TZVP//TPSS-D3(BJ)/def2-TZVP level, including the ZPE correction at the TPSS-D3(BJ)/def2-TZVP level.

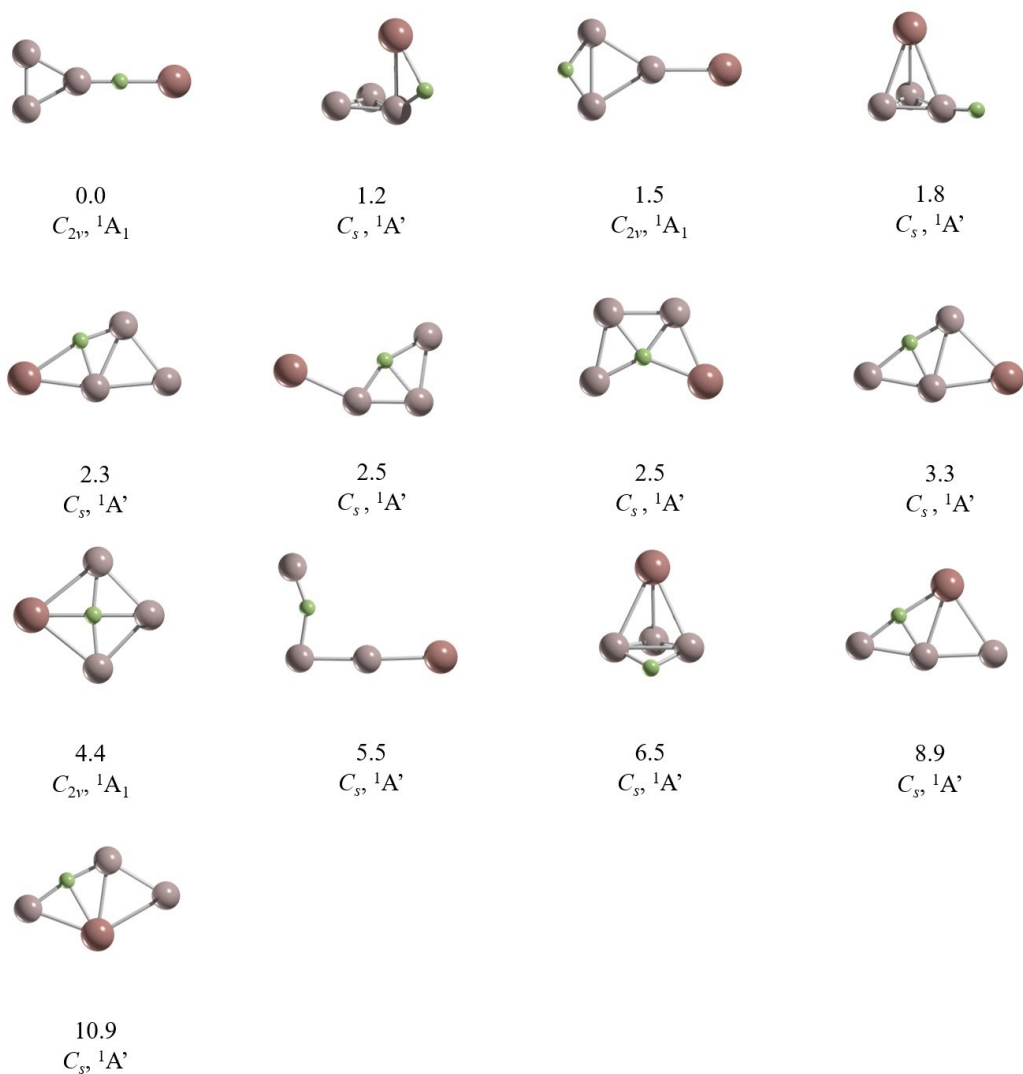

**Figure S6.** TPSS-D3(BJ)/def2-TZVP structures of the lowest-energy isomers of  $FGa_3Tl^+$ . Relative energies in kcal/mol were computed at the CCSD(T)/def2-TZVP//TPSS-D3(BJ)/def2-TZVP level, including the ZPE correction at the TPSS-D3(BJ)/def2-TZVP level.

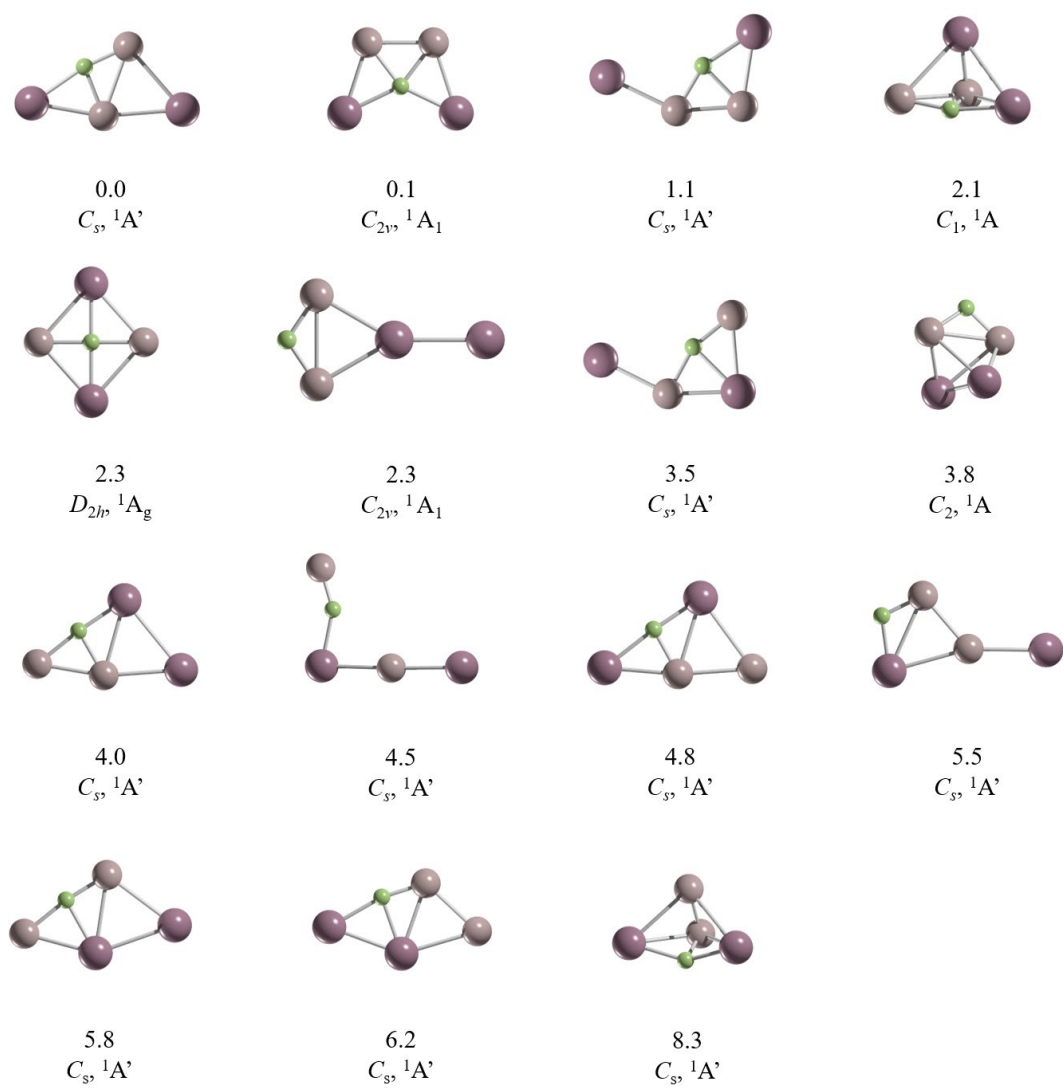

**Figure S7.** TPSS-D3(BJ)/def2-TZVP structures of the lowest-energy isomers of  $FGa_2In_2^+$ . Relative energies in kcal/mol were computed at the CCSD(T)/def2-TZVP//TPSS-D3(BJ)/def2-TZVP level, including the ZPE correction at the TPSS-D3(BJ)/def2-TZVP level.

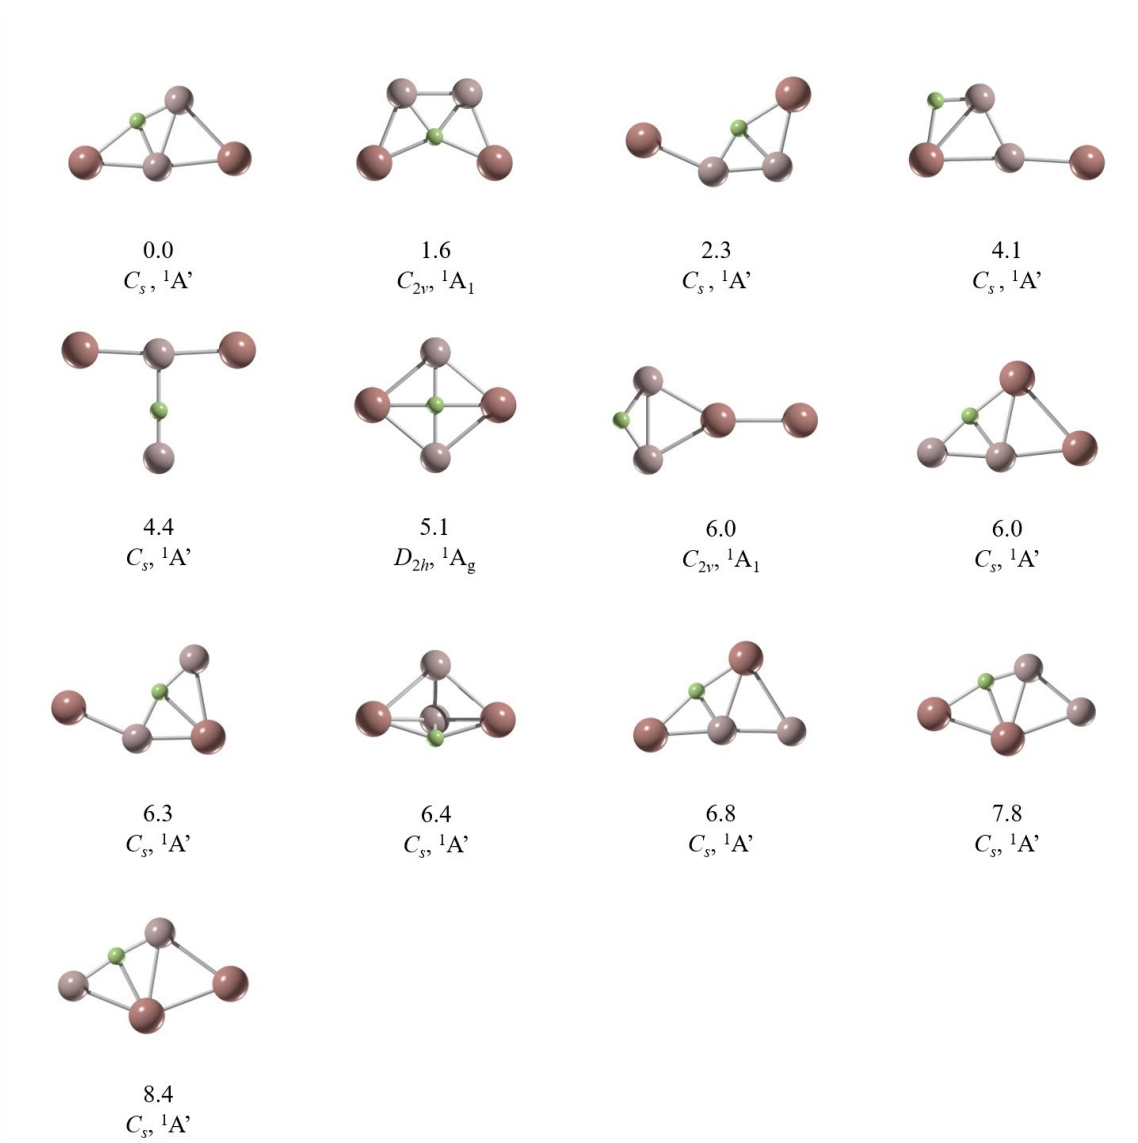

**Figure S8.** TPSS-D3(BJ)/def2-TZVP structures of the lowest-energy isomers of  $\text{FGa}_2\text{Tl}_2^+$ . Relative energies in kcal/mol were computed at the CCSD(T)/def2-TZVP//TPSS-D3(BJ)/def2-TZVP level, including the ZPE correction at the TPSS-D3(BJ)/def2-TZVP level.

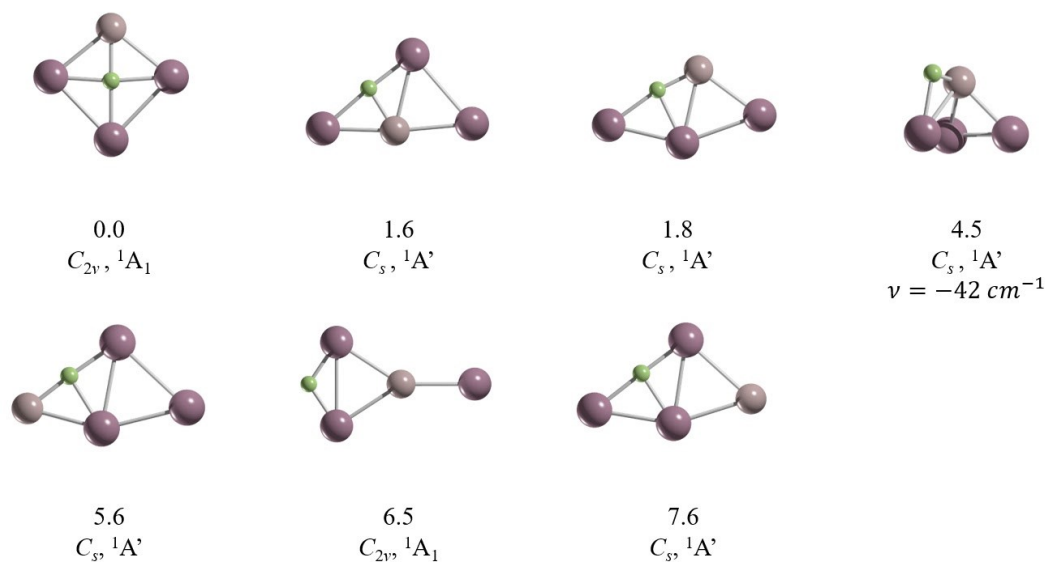

**Figure S9.** TPSS-D3(BJ)/def2-TZVP structures of the lowest-energy isomers of  $\text{FGaIn}_3^+$ . Relative energies in kcal/mol were computed at the CCSD(T)/def2-TZVP//TPSS-D3(BJ)/def2-TZVP level, including the ZPE correction at the TPSS-D3(BJ)/def2-TZVP level.



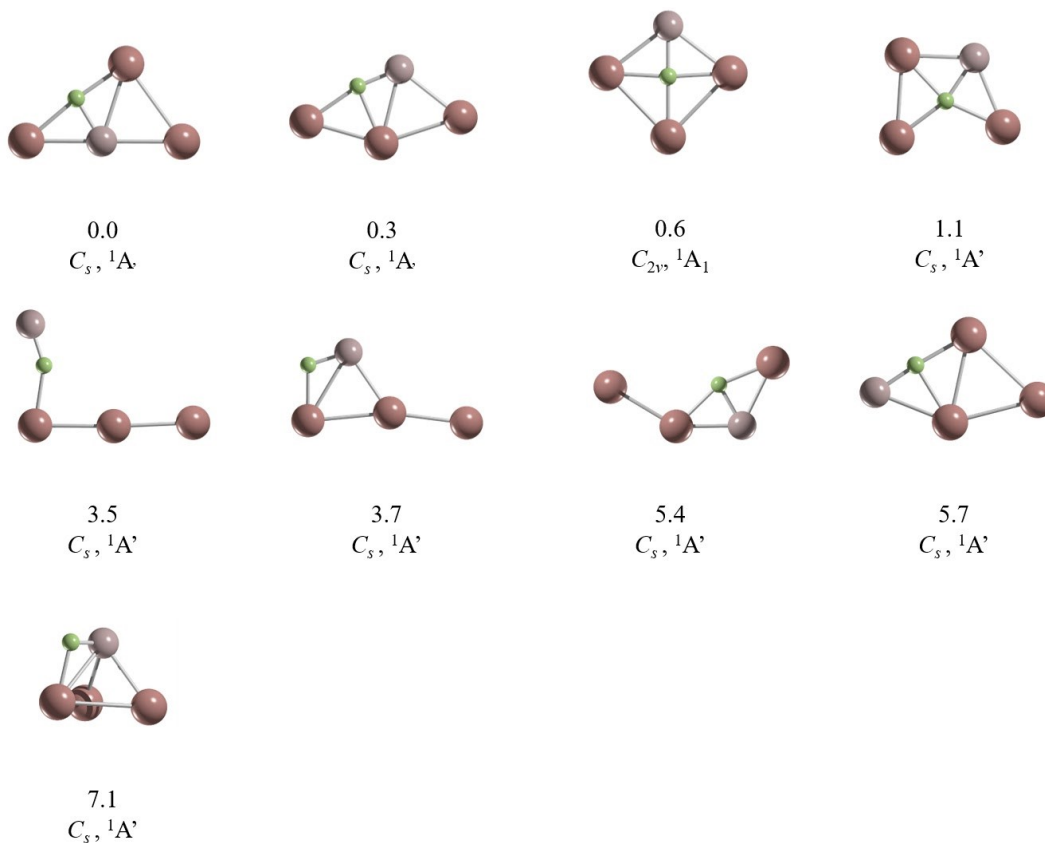

**Figure S10.** TPSS-D3(BJ)/def2-TZVP structures of the lowest-energy isomers of  $\text{FGaTl}_3^+$ . Relative energies in kcal/mol were computed at the CCSD(T)/def2-TZVP//TPSS-D3(BJ)/def2-TZVP level, including the ZPE correction at the TPSS-D3(BJ)/def2-TZVP level.

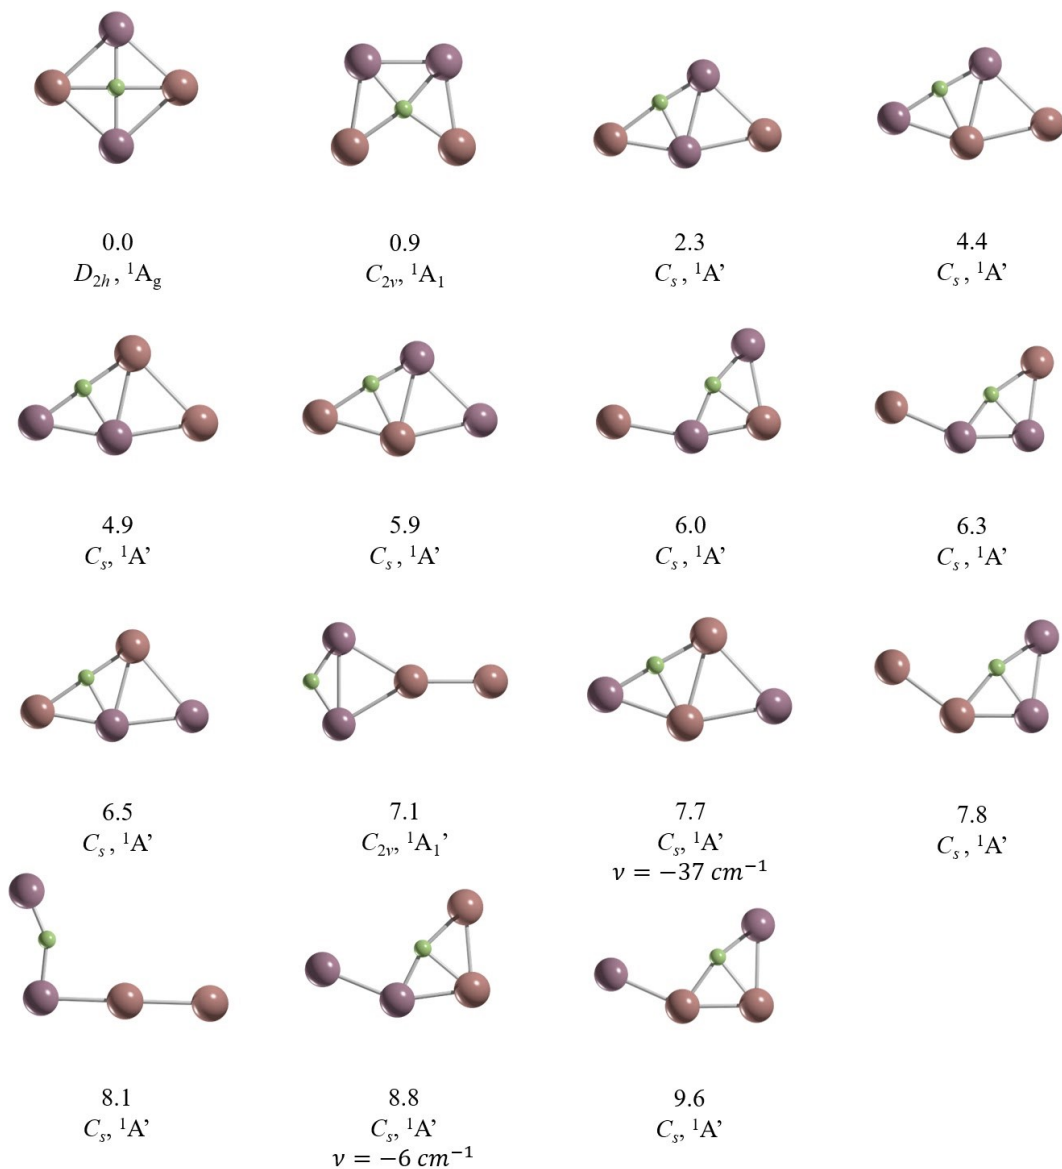

**Figure S11.** TPSS-D3(BJ)/def2-TZVP structures of the lowest-energy isomers of  $\text{FIn}_2\text{Tl}_2^+$ . Relative energies in kcal/mol were computed at the CCSD(T)/def2-TZVP//TPSS-D3(BJ)/def2-TZVP level, including the ZPE correction at the TPSS-D3(BJ)/def2-TZVP level.

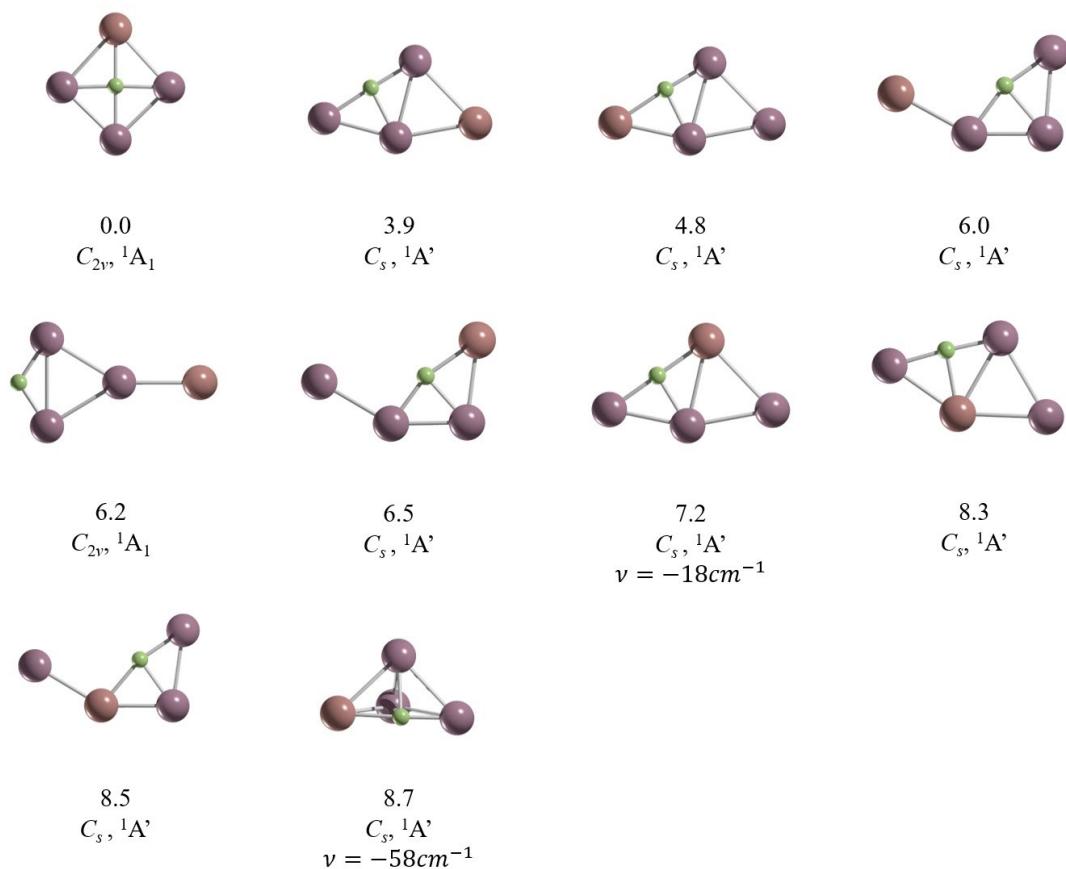

**Figure S12.** TPSS-D3(BJ)/def2-TZVP structures of the lowest-energy isomers of  $\text{FIn}_3\text{TI}^+$ . Relative energies in kcal/mol were computed at the CCSD(T)/def2-TZVP//TPSS-D3(BJ)/def2-TZVP level, including the ZPE correction at the TPSS-D3(BJ)/def2-TZVP level.

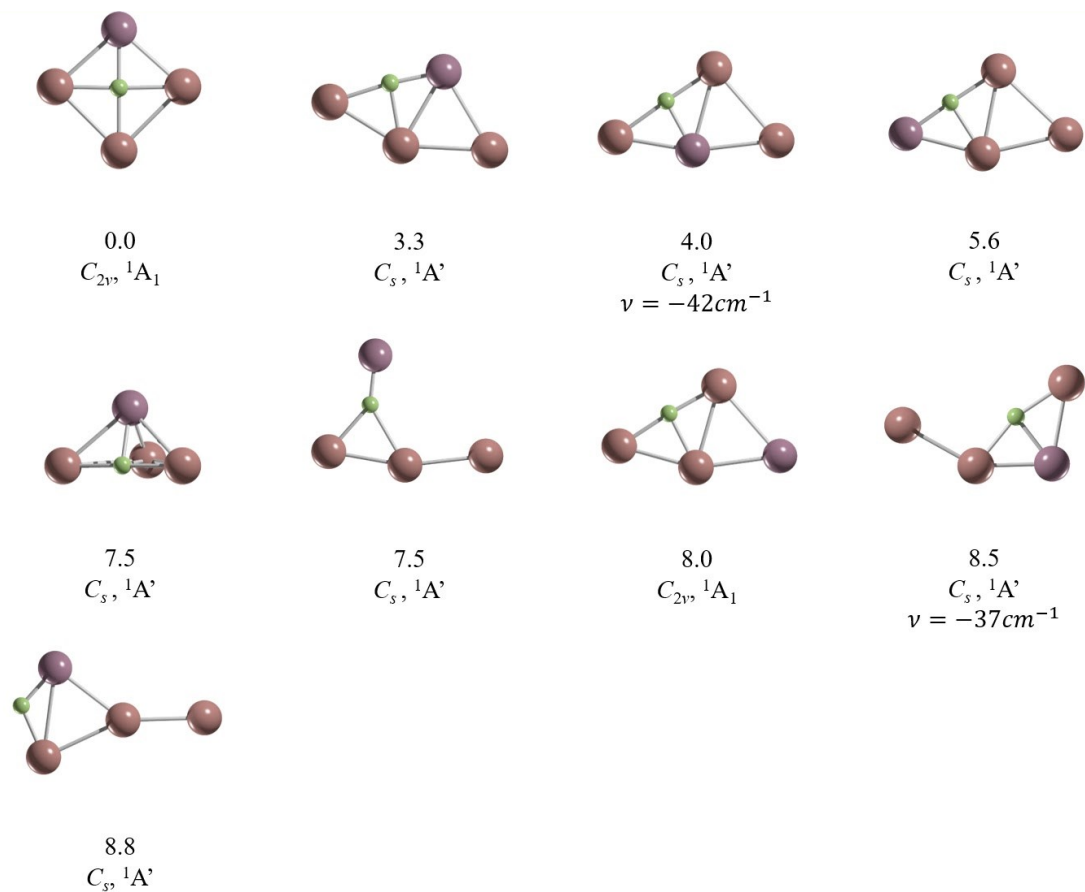

**Figure S13.** TPSS-D3(BJ)/def2-TZVP structures of the lowest-energy isomers of  $\text{FInTl}_3^+$ . Relative energies in kcal/mol were computed at the CCSD(T)/def2-TZVP//TPSS-D3(BJ)/def2-TZVP level, including the ZPE correction at the TPSS-D3(BJ)/def2-TZVP level.

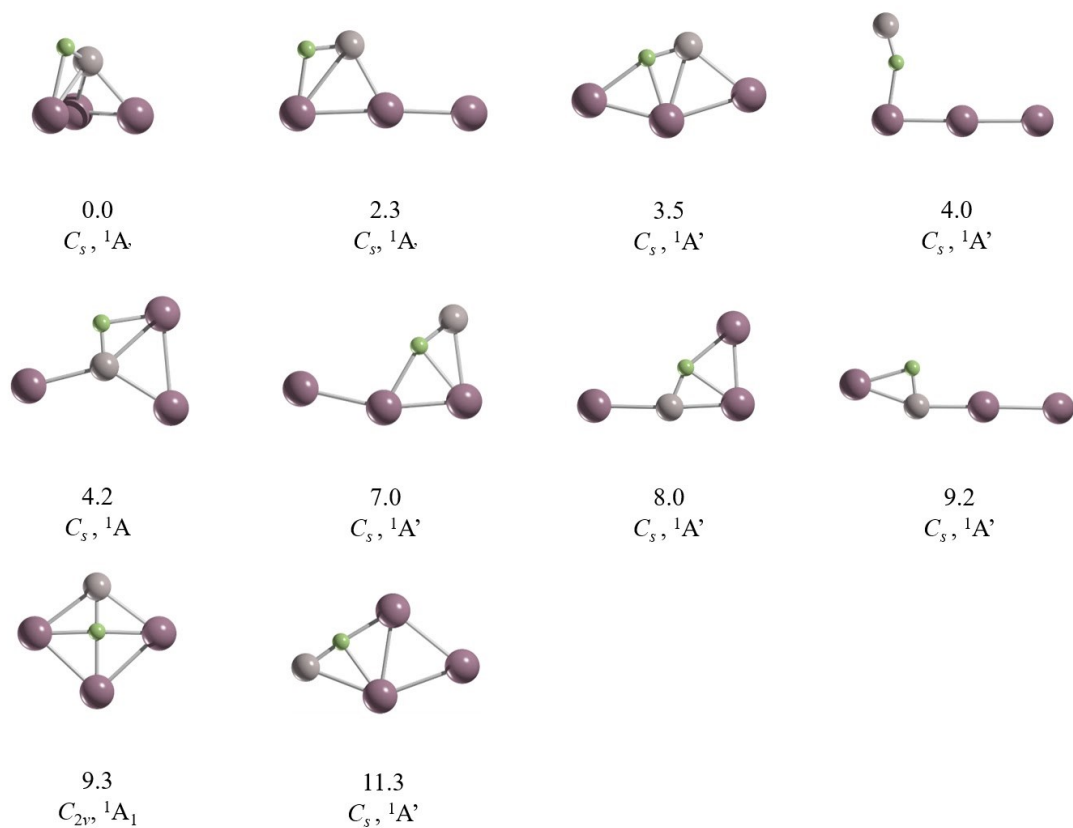

**Figure S14.** TPSS-D3(BJ)/def2-TZVP structures of the lowest-energy isomers of  $FIn_3Al^+$ . Relative energies in kcal/mol were computed at the CCSD(T)/def2-TZVP//TPSS-D3(BJ)/def2-TZVP level, including the ZPE correction at the TPSS-D3(BJ)/def2-TZVP level.

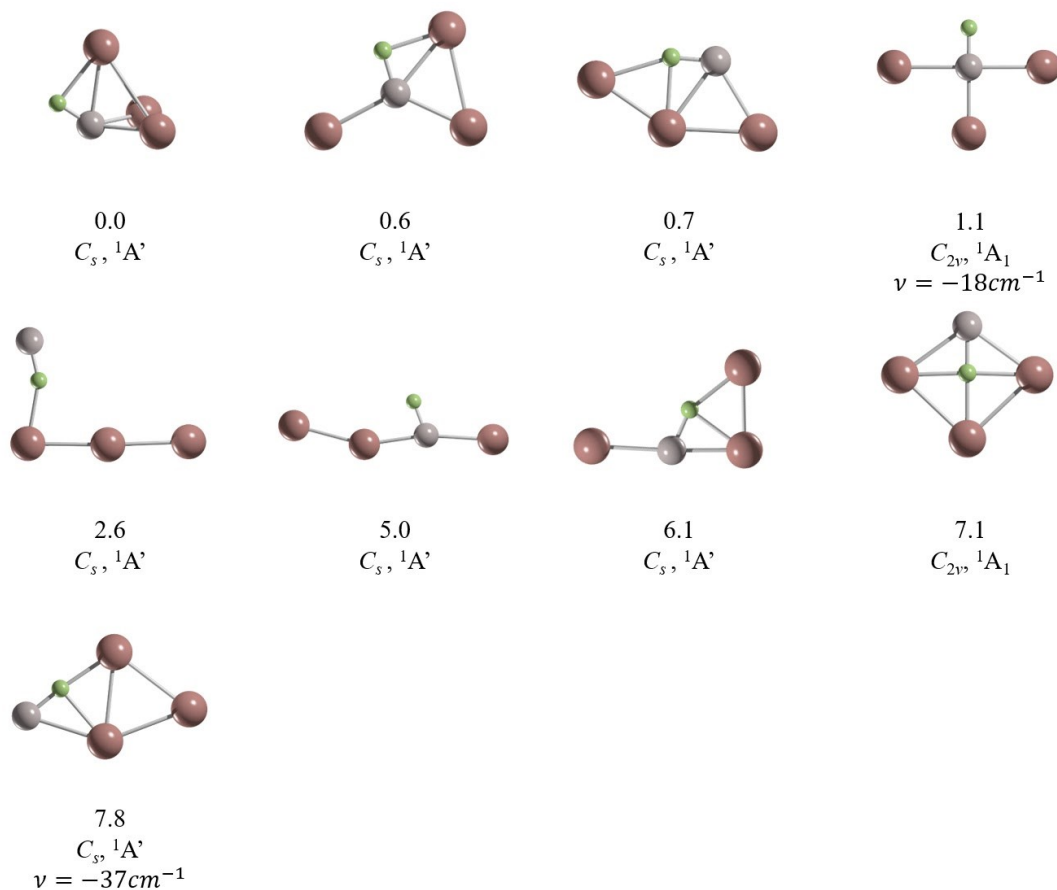

**Figure S15.** TPSS-D3(BJ)/def2-TZVP structures of the lowest-energy isomers of  $\text{FTl}_3\text{Al}^+$ . Relative energies in kcal/mol were computed at the CCSD(T)/def2-TZVP//TPSS-D3(BJ)/def2-TZVP level, including the ZPE correction at the TPSS-D3(BJ)/def2-TZVP level.

**Table S1.** First AdNDP solution for  $\text{CAI}_4^{2-}$ ,  $\text{NAI}_4^-$ ,  $\text{OAl}_4$ , and  $\text{FAl}_4^+$ . The values indicate occupation number.

|                     | 4 x 2c-2e<br>Center-Al $\sigma$ -bonds                                                      | 4 x 3c-2e<br>Center-Al-Al $\sigma$ -bonds                                                   | $\pi$ -bond                                                                                   |
|---------------------|---------------------------------------------------------------------------------------------|---------------------------------------------------------------------------------------------|-----------------------------------------------------------------------------------------------|
| $\text{CAI}_4^{2-}$ | 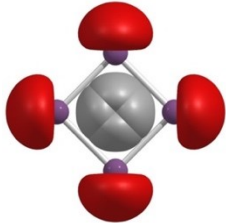<br>1.96   | <br>1.95   | <br>2.00   |
| $\text{NAI}_4^-$    | <br>1.98   | <br>1.97   | <br>2.00   |
| $\text{OAl}_4$      | <br>1.98 | <br>1.97 | <br>2.00 |
| $\text{FAl}_4^+$    | <br>1.99 | <br>1.98 | <br>2.00 |

**Table S2.** Second AdNDP solution for  $\text{CAI}_4^{2-}$ ,  $\text{NAI}_4^-$ ,  $\text{OAl}_4$ , and  $\text{FAl}_4^+$ . The values indicate occupation number.

|                     | 4 x 1c-2e<br>LP Al                                                                          | 1c-2e Central atom                                                                          |                                                                                             |                                                                                              | 4c-2e $\text{Al}_4$<br>$\sigma$ -bond                                                         | $\pi$ -bond                                                                                   |
|---------------------|---------------------------------------------------------------------------------------------|---------------------------------------------------------------------------------------------|---------------------------------------------------------------------------------------------|----------------------------------------------------------------------------------------------|-----------------------------------------------------------------------------------------------|-----------------------------------------------------------------------------------------------|
| $\text{CAI}_4^{2-}$ | 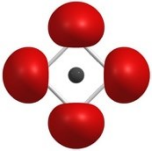<br>1.88   | <br>1.72   | <br>1.72   | <br>1.57   | <br>2.00   | <br>2.00   |
| $\text{NAI}_4^-$    | <br>1.84   | <br>1.82   | <br>1.82   | <br>1.77   | <br>2.00   | <br>2.00   |
| $\text{OAl}_4$      | <br>1.83  | <br>1.90  | <br>1.90  | <br>1.89  | <br>2.00  | <br>2.00  |
| $\text{FAl}_4^+$    | <br>1.87 | <br>1.94 | <br>1.94 | <br>1.95 | <br>2.00 | <br>2.00 |



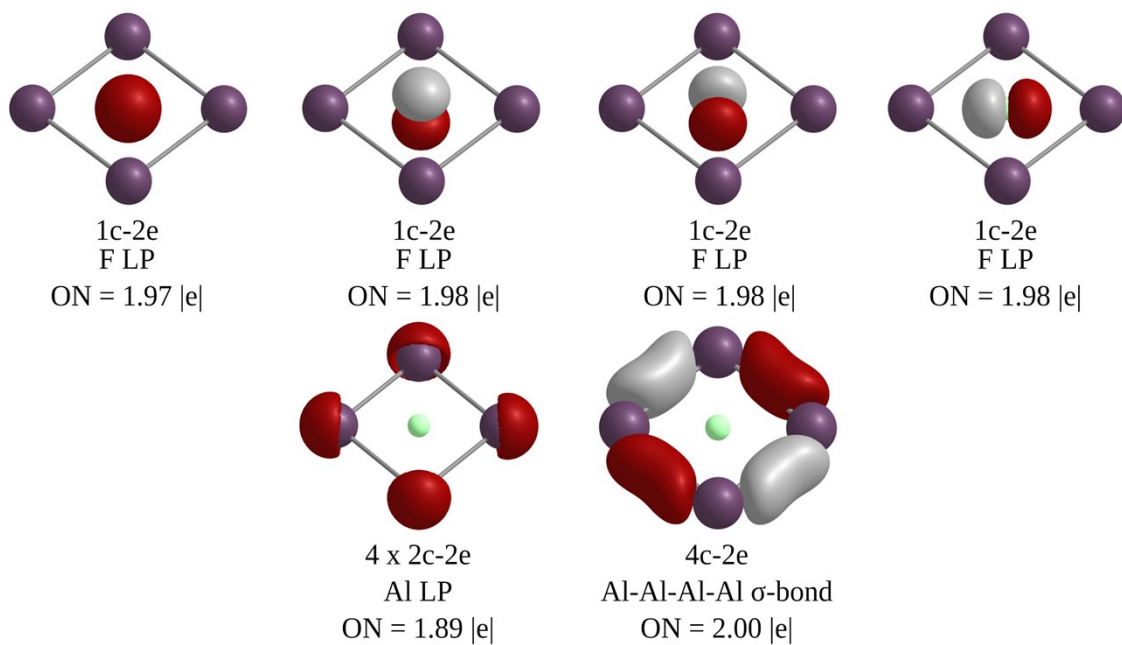

**Figure S16.** Second AdNDP solution for  $\text{FAI}_4^+$ . ON stands for occupation number.

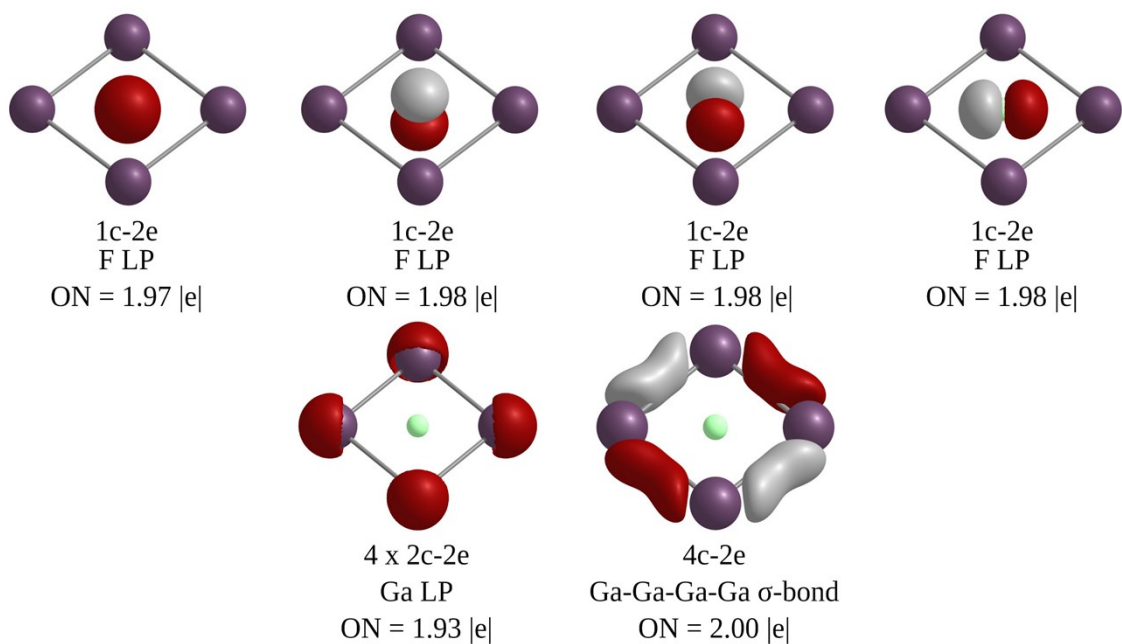

**Figure S17.** Second AdNDP solution for  $\text{FGa}_4^+$ . ON stands for occupation number.

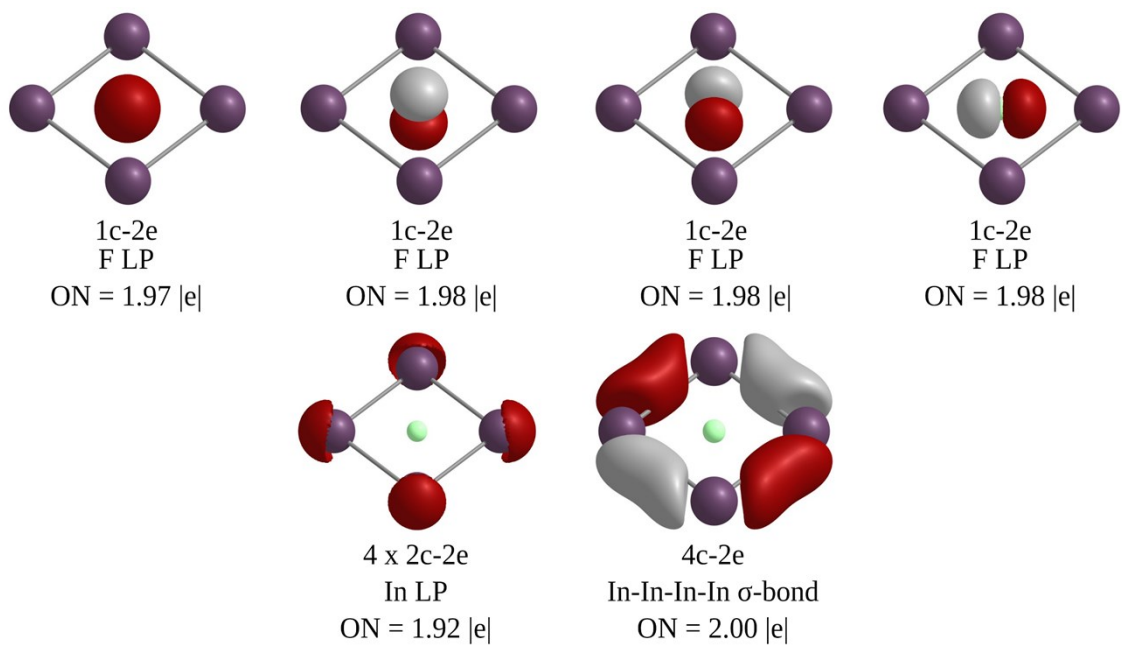

**Figure S18.** Second AdNDP solution for  $\text{FIn}_4^+$ . ON stands for occupation number.

## Molecular coordinates Figure S1

### 1 $\text{FAl}_4^+$

|    |              |              |              |
|----|--------------|--------------|--------------|
| Al | 0.000000000  | -1.386158000 | -0.687485241 |
| F  | 0.000000000  | 0.000000000  | -1.934328241 |
| Al | -1.267410000 | 0.000000000  | 1.368490759  |
| Al | 0.000000000  | 1.386158000  | -0.687485241 |
| Al | 1.267410000  | 0.000000000  | 1.368490759  |

### 2 $\text{FAl}_4^+$

|    |              |             |              |
|----|--------------|-------------|--------------|
| Al | 0.000000000  | 0.000000000 | 0.134401931  |
| Al | 1.228210000  | 0.000000000 | 2.341816931  |
| Al | 0.000000000  | 0.000000000 | -3.599763069 |
| Al | -1.228210000 | 0.000000000 | 2.341816931  |
| F  | 0.000000000  | 0.000000000 | -1.730191069 |

### 3 $\text{FAl}_4^+$

|    |              |              |              |
|----|--------------|--------------|--------------|
| Al | 0.660149000  | 1.132280000  | 0.000000000  |
| Al | 0.660149000  | -1.175465000 | 1.214310000  |
| F  | 0.556969000  | 2.773065000  | 0.000000000  |
| Al | -2.366040000 | -0.701163000 | 0.000000000  |
| Al | 0.660149000  | -1.175465000 | -1.214310000 |

### 4 $\text{FAl}_4^+$

|    |              |              |             |
|----|--------------|--------------|-------------|
| Al | -1.150666096 | -2.064627668 | 0.000000000 |
| Al | 1.116419695  | -0.361641339 | 0.000000000 |
| Al | -2.050366393 | 0.428084971  | 0.000000000 |
| F  | -2.774410313 | 1.910230486  | 0.000000000 |
| Al | 4.038147560  | 0.653140857  | 0.000000000 |

### 5 $\text{FAl}_4^+$

|    |              |              |              |
|----|--------------|--------------|--------------|
| Al | 0.000000000  | 2.051350000  | -0.121974000 |
| F  | 0.000000000  | 0.000000000  | 0.704741000  |
| Al | -2.051350000 | 0.000000000  | -0.121974000 |
| Al | 2.051350000  | 0.000000000  | -0.121974000 |
| Al | 0.000000000  | -2.051350000 | -0.121974000 |

**6 FAl<sub>4</sub><sup>+</sup>**

|    |              |              |             |
|----|--------------|--------------|-------------|
| Al | 0.000000000  | 2.214294000  | 0.000000000 |
| F  | 0.000000000  | 0.000000000  | 0.000000000 |
| Al | 2.214294000  | 0.000000000  | 0.000000000 |
| Al | -2.214294000 | 0.000000000  | 0.000000000 |
| Al | 0.000000000  | -2.214294000 | 0.000000000 |

**Molecular coordinates Figure S2**

**1 FGa<sub>4</sub><sup>+</sup>**

|    |             |              |              |
|----|-------------|--------------|--------------|
| Ga | 0.000000000 | 0.000000000  | -0.025910000 |
| Ga | 0.000000000 | 1.224216000  | -2.238755000 |
| Ga | 0.000000000 | 0.000000000  | 3.938604000  |
| Ga | 0.000000000 | -1.224216000 | -2.238755000 |
| F  | 0.000000000 | 0.000000000  | 1.945480000  |

**2 FGa<sub>4</sub><sup>+</sup>**

|    |              |              |              |
|----|--------------|--------------|--------------|
| Ga | 0.000000000  | 2.204034000  | -0.034393000 |
| F  | 0.000000000  | 0.000000000  | 0.473860000  |
| Ga | 2.204034000  | 0.000000000  | -0.034393000 |
| Ga | -2.204034000 | 0.000000000  | -0.034393000 |
| Ga | 0.000000000  | -2.204034000 | -0.034393000 |

**3 FGa<sub>4</sub><sup>+</sup>**

|    |              |             |             |
|----|--------------|-------------|-------------|
| Ga | -0.802199000 | 1.085260000 | 0.000000000 |
|----|--------------|-------------|-------------|

|    |              |              |              |
|----|--------------|--------------|--------------|
| Ga | 2.219180000  | 0.713562000  | 0.000000000  |
| Ga | -0.802199000 | -1.227805000 | 1.236205000  |
| F  | 0.645547000  | 2.262273000  | 0.000000000  |
| Ga | -0.802199000 | -1.227805000 | -1.236205000 |

**4 FGa<sub>4</sub><sup>+</sup>**

|    |              |              |             |
|----|--------------|--------------|-------------|
| F  | 0.000000000  | 0.802971000  | 0.000000000 |
| Ga | -1.048708000 | 2.634300000  | 0.000000000 |
| Ga | 0.153266000  | -1.359941000 | 0.000000000 |
| Ga | -2.207853000 | -0.048634000 | 0.000000000 |
| Ga | 3.103295000  | -1.458846000 | 0.000000000 |

**5 FGa<sub>4</sub><sup>+</sup>**

|    |              |              |             |
|----|--------------|--------------|-------------|
| Ga | 0.000000000  | 2.238115000  | 0.000000000 |
| Ga | 2.238115000  | 0.000000000  | 0.000000000 |
| Ga | 0.000000000  | -2.238115000 | 0.000000000 |
| Ga | -2.238115000 | 0.000000000  | 0.000000000 |
| F  | 0.000000000  | 0.000000000  | 0.000000000 |

**6 FGa<sub>4</sub><sup>+</sup>**

|    |              |              |             |
|----|--------------|--------------|-------------|
| F  | -1.284963000 | -0.707265000 | 0.000000000 |
| Ga | 0.313512000  | -1.961346000 | 0.000000000 |
| Ga | 0.000000000  | 1.105242000  | 0.000000000 |
| Ga | -2.864095000 | 1.027025000  | 0.000000000 |
| Ga | 2.923637000  | 0.034414000  | 0.000000000 |

**7 FGa<sub>4</sub><sup>+</sup>**

|    |              |             |              |
|----|--------------|-------------|--------------|
| Ga | 0.000000000  | 1.543673000 | 0.967465000  |
| F  | 0.000000000  | 0.000000000 | 2.214239000  |
| Ga | -1.298455000 | 0.000000000 | -1.288887000 |

|    |             |              |              |
|----|-------------|--------------|--------------|
| Ga | 0.000000000 | -1.543673000 | 0.967465000  |
| Ga | 1.298455000 | 0.000000000  | -1.288887000 |

### Molecular coordinates Figure S3

#### 1 $\text{FIn}_4^+$

1.96

#### 2 $\text{FIn}_4^+$

|    |              |              |             |
|----|--------------|--------------|-------------|
| In | 3.237975708  | -0.355377906 | 0.000000000 |
| In | -0.157611184 | -1.283640087 | 0.000000000 |
| In | -3.333789452 | -0.598254567 | 0.000000000 |
| F  | -1.376796862 | 0.841135022  | 0.000000000 |
| In | 0.506305782  | 2.082778562  | 0.000000000 |

#### 3 $\text{FIn}_4^+$

|    |              |              |             |
|----|--------------|--------------|-------------|
| F  | -0.887180116 | 0.077618203  | 0.000000000 |
| In | 1.482749421  | -0.182419288 | 0.000000000 |
| In | -3.124374552 | -0.402513501 | 0.000000000 |
| In | 2.359770467  | 3.007223847  | 0.000000000 |
| In | -0.555193872 | -2.436548468 | 0.000000000 |

#### 4 $\text{FIn}_4^+$

|    |              |              |              |
|----|--------------|--------------|--------------|
| F  | -0.000000001 | 0.000000000  | -1.105734105 |
| In | -0.000000001 | -2.390112000 | -1.086976105 |
| In | -1.424213999 | 0.000000000  | 1.178387896  |
| In | 1.424214000  | 0.000000000  | 1.178387894  |
| In | -0.000000001 | 2.390112000  | -1.086976105 |

### Molecular coordinates Figure S4

#### 1 $\text{FTl}_4^+$

|    |              |              |             |
|----|--------------|--------------|-------------|
| F  | 0.000000000  | 0.000000000  | 0.000000000 |
| Tl | 0.000000000  | 2.532739000  | 0.000000000 |
| Tl | 2.532739000  | 0.000000000  | 0.000000000 |
| Tl | 0.000000000  | -2.532739000 | 0.000000000 |
| Tl | -2.532739000 | 0.000000000  | 0.000000000 |

### 2 F<sub>Tl4</sub><sup>+</sup>

|    |              |              |             |
|----|--------------|--------------|-------------|
| Tl | -0.176775864 | -1.257825627 | 0.000000000 |
| F  | -1.485611485 | 0.889707732  | 0.000000000 |
| Tl | 0.496795793  | 2.223935577  | 0.000000000 |
| Tl | 3.288604342  | -0.448068839 | 0.000000000 |
| Tl | -3.443556091 | -0.616898232 | 0.000000000 |

### 3 F<sub>Tl4</sub><sup>+</sup>

|    |              |              |              |
|----|--------------|--------------|--------------|
| Tl | 0.000000000  | 1.481668000  | -1.142513000 |
| Tl | 0.000000000  | -1.481668000 | -1.142513000 |
| F  | 0.000000000  | 0.000000000  | 1.111440000  |
| Tl | 2.497594000  | 0.000000000  | 1.080766000  |
| Tl | -2.497594000 | 0.000000000  | 1.080766000  |

### 4 F<sub>Tl4</sub><sup>+</sup>

|    |              |              |             |
|----|--------------|--------------|-------------|
| F  | -0.881493542 | 0.155431094  | 0.000000000 |
| Tl | 1.573792322  | -0.352489273 | 0.000000000 |
| Tl | -0.752105706 | -2.427641545 | 0.000000000 |
| Tl | 2.519534866  | 2.846263500  | 0.000000000 |
| Tl | -3.243277427 | -0.083402863 | 0.000000000 |

## Molecular coordinates Figure S5

### 1 FGa<sub>3</sub>In<sup>+</sup>

|    |              |             |             |
|----|--------------|-------------|-------------|
| Ga | -0.556805000 | 0.000000000 | 0.000000000 |
|----|--------------|-------------|-------------|

|    |              |              |             |
|----|--------------|--------------|-------------|
| Ga | -2.772372000 | 1.218446000  | 0.000000000 |
| F  | 1.359833000  | 0.000000000  | 0.000000000 |
| In | 3.610398000  | 0.000000000  | 0.000000000 |
| Ga | -2.772372000 | -1.218446000 | 0.000000000 |

### 2 FGa<sub>3</sub>In<sup>+</sup>

|    |              |              |              |
|----|--------------|--------------|--------------|
| Ga | -0.306554575 | 1.406442170  | -0.000000001 |
| In | 2.064693909  | -0.727231147 | 0.000000001  |
| Ga | -1.773487232 | -0.337377157 | 1.227903000  |
| Ga | -1.773487232 | -0.337377159 | -1.227903000 |
| F  | 1.493041049  | 1.743817530  | -0.000000001 |

### 3 FGa<sub>3</sub>In<sup>+</sup>

|    |              |              |             |
|----|--------------|--------------|-------------|
| F  | 0.328648049  | -0.153251102 | 0.000000000 |
| Ga | 1.713743960  | 1.674003609  | 0.000000000 |
| In | -1.938069158 | -1.324947880 | 0.000000000 |
| Ga | -1.057722667 | 1.650571623  | 0.000000000 |
| Ga | 2.311963478  | -1.185811268 | 0.000000000 |

### 4 FGa<sub>3</sub>In<sup>+</sup>

|    |              |              |             |
|----|--------------|--------------|-------------|
| F  | 0.676423400  | 0.806130017  | 0.000000000 |
| Ga | -0.073465817 | -1.230333424 | 0.000000000 |
| Ga | 2.224667363  | 2.269045092  | 0.000000000 |
| In | -3.101399676 | -0.421580913 | 0.000000000 |
| Ga | 2.554628414  | -0.606379298 | 0.000000000 |

### 5 FGa<sub>3</sub>In<sup>+</sup>

|    |              |              |             |
|----|--------------|--------------|-------------|
| F  | -0.679030439 | 1.051415088  | 0.000000000 |
| Ga | 1.123044797  | 1.896793814  | 0.000000000 |
| Ga | 0.223241652  | -0.966965827 | 0.000000000 |



|    |              |              |             |
|----|--------------|--------------|-------------|
| Ga | 3.281899755  | -0.335712480 | 0.000000000 |
| In | -2.803315819 | -0.568985922 | 0.000000000 |

**6 FGa<sub>3</sub>In<sup>+</sup>**

|    |              |              |             |
|----|--------------|--------------|-------------|
| Ga | -0.583012000 | -1.009806405 | 0.000000000 |
| F  | -1.567414971 | 0.990957634  | 0.000000000 |
| Ga | 0.192934730  | 2.001290756  | 0.000000000 |
| Ga | -3.392017106 | -0.470413968 | 0.000000000 |
| In | 2.680645646  | -0.511669544 | 0.000000000 |

**7 FGa<sub>3</sub>In<sup>+</sup>**

|    |              |              |             |
|----|--------------|--------------|-------------|
| F  | 0.000000000  | -0.262878000 | 0.000000000 |
| Ga | 0.000000000  | -2.546314000 | 0.000000000 |
| In | 0.000000000  | 2.181585000  | 0.000000000 |
| Ga | -2.224254000 | -0.412840000 | 0.000000000 |
| Ga | 2.224254000  | -0.412840000 | 0.000000000 |

**8 FGa<sub>3</sub>In<sup>+</sup>**

|    |              |              |             |
|----|--------------|--------------|-------------|
| F  | 0.000000000  | 0.342829000  | 0.000000000 |
| In | -2.138547000 | 1.567396000  | 0.000000000 |
| Ga | 1.205884000  | -1.391028000 | 0.000000000 |
| Ga | 3.636968000  | 0.234164000  | 0.000000000 |
| Ga | -1.462567000 | -1.420163000 | 0.000000000 |

**9 FGa<sub>3</sub>In<sup>+</sup>**

|    |              |              |             |
|----|--------------|--------------|-------------|
| Ga | -2.525073065 | -0.925570411 | 0.000000000 |
| Ga | 0.466419010  | -0.956300687 | 0.000000000 |
| F  | -2.276851079 | 1.305102305  | 0.000000000 |
| Ga | -3.096309839 | 3.022363261  | 0.000000000 |
| In | 3.679501232  | -0.961248941 | 0.000000000 |

**10 FGa<sub>3</sub>In<sup>+</sup>**

|    |              |              |             |
|----|--------------|--------------|-------------|
| In | -1.827133090 | -1.014948957 | 0.000000000 |
| Ga | 1.373373115  | -0.961646208 | 0.000000000 |
| F  | -1.719227378 | 1.433839201  | 0.000000000 |
| Ga | -2.393120364 | 3.197817144  | 0.000000000 |
| Ga | 4.406927086  | -1.048173583 | 0.000000000 |

**11 FGa<sub>3</sub>In<sup>+</sup>**

|    |              |              |              |
|----|--------------|--------------|--------------|
| Ga | 0.743543301  | -1.159566343 | -0.546723762 |
| Ga | -1.417536288 | -0.729152136 | 0.871277115  |
| In | -1.146467467 | 0.878976682  | -1.260012465 |
| Ga | 1.789501552  | 0.763814985  | 1.581528397  |
| F  | 2.399570247  | -0.910868945 | 0.294677456  |

**12 FGa<sub>3</sub>In<sup>+</sup>**

|    |              |              |             |
|----|--------------|--------------|-------------|
| Ga | -2.211502621 | -0.841289485 | 0.000000000 |
| In | 0.961254393  | -0.961254393 | 0.000000000 |
| F  | -2.037346464 | 1.390232036  | 0.000000000 |
| Ga | -2.866016921 | 3.104299179  | 0.000000000 |
| Ga | 4.149605234  | -1.147222770 | 0.000000000 |

**Molecular coordinates Figure S6****1 FGa<sub>3</sub>Tl<sup>+</sup>**

|    |              |              |             |
|----|--------------|--------------|-------------|
| F  | 0.654327000  | 0.000000000  | 0.000000000 |
| Tl | 3.042980000  | 0.000000000  | 0.000000000 |
| Ga | -3.452632000 | 1.215173000  | 0.000000000 |
| Ga | -3.452632000 | -1.215173000 | 0.000000000 |
| Ga | -1.235714000 | 0.000000000  | 0.000000000 |

**2 FGa<sub>3</sub>Tl<sup>+</sup>**

|    |              |              |              |
|----|--------------|--------------|--------------|
| Ga | 1.271925943  | 1.205063687  | 0.000000000  |
| Tl | -1.732032012 | 0.035121093  | 0.000000000  |
| Ga | 1.966726379  | -0.966985065 | -1.224186000 |
| Ga | 1.966726380  | -0.966985063 | 1.224186000  |
| F  | -0.198024486 | 2.265530869  | -0.000000002 |

**3 FGa<sub>3</sub>Tl<sup>+</sup>**

|    |              |              |             |
|----|--------------|--------------|-------------|
| Ga | -2.989455000 | 1.632134000  | 0.000000000 |
| Tl | 2.889552000  | 0.000000000  | 0.000000000 |
| Ga | -0.368970000 | 0.000000000  | 0.000000000 |
| F  | -4.141047000 | 0.000000000  | 0.000000000 |
| Ga | -2.989455000 | -1.632134000 | 0.000000000 |

**4 FGa<sub>3</sub>Tl<sup>+</sup>**

|    |              |              |              |
|----|--------------|--------------|--------------|
| Ga | 1.890725640  | 1.073200491  | 0.000000000  |
| Ga | 1.392120946  | -1.165116120 | 1.209397000  |
| Ga | 1.392120947  | -1.165116121 | -1.209397000 |
| Tl | -1.765977092 | 0.162022162  | 0.000000000  |
| F  | 2.092528067  | 2.812415674  | 0.000000000  |

**5 FGa<sub>3</sub>Tl<sup>+</sup>**

|    |              |              |             |
|----|--------------|--------------|-------------|
| Ga | 0.663748914  | -0.791025152 | 0.000000000 |
| Ga | 3.768788637  | -0.518338543 | 0.000000000 |
| F  | 0.012907068  | 1.270671058  | 0.000000000 |
| Tl | -2.417728896 | -0.376230361 | 0.000000000 |
| Ga | 1.881007197  | 1.923513881  | 0.000000000 |

**6 FGa<sub>3</sub>Tl<sup>+</sup>**

|   |             |             |             |
|---|-------------|-------------|-------------|
| F | 1.516312076 | 0.452912775 | 0.000000000 |
|---|-------------|-------------|-------------|

|    |              |              |             |
|----|--------------|--------------|-------------|
| Ga | 0.102697093  | -1.173833148 | 0.000000000 |
| Ga | 3.496868520  | 1.268007324  | 0.000000000 |
| Ga | 2.774581153  | -1.521414761 | 0.000000000 |
| Tl | -2.607966963 | 0.495903766  | 0.000000000 |

**7 FGa<sub>3</sub>Tl<sup>+</sup>**

|    |              |              |             |
|----|--------------|--------------|-------------|
| F  | -0.781884000 | 0.000000000  | 0.000000000 |
| Tl | 1.784104000  | -1.013166000 | 0.000000000 |
| Ga | 0.536144000  | 1.827944000  | 0.000000000 |
| Ga | -2.196832000 | 1.824761000  | 0.000000000 |
| Ga | -2.774004000 | -1.005401000 | 0.000000000 |

**8 FGa<sub>3</sub>Tl<sup>+</sup>**

|    |              |              |             |
|----|--------------|--------------|-------------|
| Ga | -3.872558064 | -0.363265270 | 0.000000000 |
| F  | -2.051178925 | 1.106659815  | 0.000000000 |
| Ga | -0.288592513 | 2.111295660  | 0.000000000 |
| Tl | 2.229442086  | -0.448774551 | 0.000000000 |
| Ga | -1.068662640 | -0.896714427 | 0.000000000 |

**9 FGa<sub>3</sub>Tl<sup>+</sup>**

|    |              |             |              |
|----|--------------|-------------|--------------|
| F  | 0.000000000  | 0.000000000 | 0.778643670  |
| Tl | 0.000000000  | 0.000000000 | -1.764600330 |
| Ga | 2.199266000  | 0.000000000 | 0.973766670  |
| Ga | 0.000000000  | 0.000000000 | 3.085493670  |
| Ga | -2.199266000 | 0.000000000 | 0.973766670  |

**10 FGa<sub>3</sub>Tl<sup>+</sup>**

|    |              |              |             |
|----|--------------|--------------|-------------|
| Ga | -2.925828637 | -1.899031659 | 0.000000000 |
| Ga | -0.118197988 | -0.901767544 | 0.000000000 |
| F  | -3.383830745 | 0.312441109  | 0.000000000 |

|    |              |             |             |
|----|--------------|-------------|-------------|
| Ga | -4.614044726 | 1.761139475 | 0.000000000 |
| Tl | 2.888776835  | 0.320641960 | 0.000000000 |

### 11 FGa<sub>3</sub>Tl<sup>+</sup>

|    |              |              |              |
|----|--------------|--------------|--------------|
| Ga | 1.563720777  | -0.656148645 | -1.568590999 |
| Ga | 1.420392366  | 1.499354123  | -0.000000005 |
| Ga | 1.563720778  | -0.656148639 | 1.568591002  |
| Tl | -1.748132800 | 0.084766016  | 0.000000000  |
| F  | 2.361242807  | -1.593180842 | 0.000000002  |

### 12 FGa<sub>3</sub>Tl<sup>+</sup>

|    |              |              |             |
|----|--------------|--------------|-------------|
| Ga | -1.085962256 | -1.364030117 | 0.000000000 |
| F  | -1.419866321 | 0.732892661  | 0.000000000 |
| Tl | 1.081752713  | 1.156803100  | 0.000000000 |
| Ga | -3.513072584 | 0.165653002  | 0.000000000 |
| Ga | 1.773435318  | -2.443788423 | 0.000000000 |

### 13 FGa<sub>3</sub>Tl<sup>+</sup>

|    |              |              |             |
|----|--------------|--------------|-------------|
| Ga | 3.020480000  | 0.570294000  | 0.000000000 |
| Tl | 0.000000000  | -1.163537000 | 0.000000000 |
| Ga | 0.447103000  | 2.126657000  | 0.000000000 |
| F  | -1.354584000 | 1.242261000  | 0.000000000 |
| Ga | -3.074316000 | -0.017398000 | 0.000000000 |

## Molecular coordinates Figure S7

### 1 FGa<sub>2</sub>In<sub>2</sub><sup>+</sup>

|    |             |              |             |
|----|-------------|--------------|-------------|
| Ga | 0.000000000 | 0.899578000  | 0.000000000 |
| In | 3.115006000 | -0.210764000 | 0.000000000 |

|    |              |              |             |
|----|--------------|--------------|-------------|
| In | -3.032247000 | 1.164592000  | 0.000000000 |
| F  | -1.297186000 | -0.867848000 | 0.000000000 |
| Ga | 0.245790000  | -2.155286000 | 0.000000000 |

**2 FGa<sub>2</sub>In<sub>2</sub><sup>+</sup>**

|    |              |              |             |
|----|--------------|--------------|-------------|
| In | -2.301171000 | -1.127916000 | 0.000000000 |
| Ga | 1.366719000  | 1.785803000  | 0.000000000 |
| In | 2.301171000  | -1.127916000 | 0.000000000 |
| F  | 0.000000000  | -0.020444000 | 0.000000000 |
| Ga | -1.366719000 | 1.785803000  | 0.000000000 |

**3 FGa<sub>2</sub>In<sub>2</sub><sup>+</sup>**

|    |              |              |             |
|----|--------------|--------------|-------------|
| Ga | 1.426959000  | -0.686826000 | 0.000000000 |
| In | 2.676136999  | 2.169973001  | 0.000000000 |
| In | -3.021637000 | -0.291165000 | 0.000000000 |
| F  | -0.570458000 | 0.000000000  | 0.000000000 |
| Ga | -0.715229000 | -2.282903000 | 0.000000000 |

**4 FGa<sub>2</sub>In<sub>2</sub><sup>+</sup>**

|    |              |              |              |
|----|--------------|--------------|--------------|
| Ga | 0.074251184  | -0.489636643 | -1.524026120 |
| In | -0.181303256 | 1.912720380  | -0.350416260 |
| In | 1.885086673  | -0.975617083 | 1.152583607  |
| Ga | -2.596090693 | -0.672479352 | 0.098054680  |
| F  | -0.589817636 | -1.099163476 | 0.544329306  |

**5 FGa<sub>2</sub>In<sub>2</sub><sup>+</sup>**

|    |              |              |             |
|----|--------------|--------------|-------------|
| Ga | -2.216701000 | 0.000000000  | 0.000000000 |
| Ga | 2.216701000  | 0.000000000  | 0.000000000 |
| F  | 0.000000000  | 0.000000000  | 0.000000000 |
| In | 0.000000000  | -2.485209000 | 0.000000000 |

|    |             |             |             |
|----|-------------|-------------|-------------|
| In | 0.000000000 | 2.485209000 | 0.000000000 |
|----|-------------|-------------|-------------|

**6 FGa<sub>2</sub>In<sub>2</sub><sup>+</sup>**

|    |              |              |             |
|----|--------------|--------------|-------------|
| Ga | -2.594788000 | 1.662582000  | 0.000000000 |
| In | 3.678239000  | 0.000000000  | 0.000000000 |
| In | 0.285598000  | 0.000000000  | 0.000000000 |
| Ga | -2.594788000 | -1.662582000 | 0.000000000 |
| F  | -3.705691000 | 0.000000000  | 0.000000000 |

**7 FGa<sub>2</sub>In<sub>2</sub><sup>+</sup>**

|    |              |              |             |
|----|--------------|--------------|-------------|
| F  | 0.458874643  | -0.829767717 | 0.000000000 |
| Ga | 2.014929422  | -2.165917071 | 0.000000000 |
| Ga | -0.525550715 | 1.123575792  | 0.000000000 |
| In | 2.381403375  | 0.975168896  | 0.000000000 |
| In | -3.350684315 | -0.212721244 | 0.000000000 |

**8 FGa<sub>2</sub>In<sub>2</sub><sup>+</sup>**

|    |              |              |              |
|----|--------------|--------------|--------------|
| Ga | 0.395085427  | 1.520654973  | 1.244314874  |
| In | 1.834669661  | -0.081846402 | -0.950941126 |
| F  | 0.000000000  | 0.000000000  | 2.474077874  |
| In | -1.834669661 | 0.081846402  | -0.950941126 |
| Ga | -0.395085427 | -1.520654973 | 1.244314874  |

**9 FGa<sub>2</sub>In<sub>2</sub><sup>+</sup>**

|    |              |              |             |
|----|--------------|--------------|-------------|
| In | 2.642903583  | -0.949954541 | 0.000000000 |
| In | 0.248526625  | 2.012002559  | 0.000000000 |
| Ga | -0.630247733 | -1.185323592 | 0.000000000 |
| F  | -1.696304021 | 0.705866923  | 0.000000000 |
| Ga | -3.447602162 | -0.698327772 | 0.000000000 |

**10 FGa<sub>2</sub>In<sub>2</sub><sup>+</sup>**

|    |              |              |             |
|----|--------------|--------------|-------------|
| In | -2.003405173 | -1.664637914 | 0.000000000 |
| Ga | 0.993585614  | -0.614043844 | 0.000000000 |
| F  | -2.440567232 | 0.776971032  | 0.000000000 |
| Ga | -3.626947029 | 2.243901576  | 0.000000000 |
| In | 3.986564620  | 0.558495560  | 0.000000000 |

**11 FGa<sub>2</sub>In<sub>2</sub><sup>+</sup>**

|    |              |              |             |
|----|--------------|--------------|-------------|
| Ga | 3.162394004  | -0.905610322 | 0.000000000 |
| Ga | 0.098019968  | -1.120373356 | 0.000000000 |
| In | -2.930488988 | -0.865558656 | 0.000000000 |
| F  | -0.905760788 | 0.713516893  | 0.000000000 |
| In | 1.034141558  | 2.016248811  | 0.000000000 |

**12 FGa<sub>2</sub>In<sub>2</sub><sup>+</sup>**

|    |              |              |             |
|----|--------------|--------------|-------------|
| In | -2.734912036 | -1.118275243 | 0.000000000 |
| Ga | 0.558461204  | -0.203263255 | 0.000000000 |
| In | 3.789296411  | -0.249649403 | 0.000000000 |
| F  | -3.050537281 | 1.183133903  | 0.000000000 |
| Ga | -1.339429611 | 2.021977044  | 0.000000000 |

**13 FGa<sub>2</sub>In<sub>2</sub><sup>+</sup>**

|    |              |              |             |
|----|--------------|--------------|-------------|
| In | 0.580765985  | -1.139817423 | 0.000000000 |
| Ga | -0.298414266 | 2.046034130  | 0.000000000 |
| In | -2.845789228 | -0.392070388 | 0.000000000 |
| F  | 1.531145591  | 1.210171332  | 0.000000000 |
| Ga | 3.434086528  | 0.023997197  | 0.000000000 |

**14 FGa<sub>2</sub>In<sub>2</sub><sup>+</sup>**

|   |              |             |             |
|---|--------------|-------------|-------------|
| F | -0.513453000 | 1.302072000 | 0.000000000 |
|---|--------------|-------------|-------------|



|    |              |              |             |
|----|--------------|--------------|-------------|
| In | -2.882792000 | 0.335015000  | 0.000000000 |
| In | 0.000000000  | -1.186076000 | 0.000000000 |
| Ga | 3.295561000  | -0.671305000 | 0.000000000 |
| Ga | 1.410178000  | 1.638510000  | 0.000000000 |

**15 FGa<sub>2</sub>In<sub>2</sub><sup>+</sup>**

|    |              |              |              |
|----|--------------|--------------|--------------|
| Ga | -0.750472738 | 1.458402152  | 0.000000000  |
| Ga | -1.720488292 | -0.843398285 | 0.000000000  |
| In | 0.655848445  | -0.221827349 | 2.424174000  |
| In | 0.655848445  | -0.221827349 | -2.424174000 |
| F  | 1.031316745  | 0.452047105  | 0.000000000  |

**Molecular coordinates Figure S8**

**1 FGa<sub>2</sub>Tl<sub>2</sub><sup>+</sup>**

|    |              |              |             |
|----|--------------|--------------|-------------|
| Ga | 0.174219640  | -0.650196549 | 0.000000000 |
| Tl | -3.147097996 | -0.290325500 | 0.000000000 |
| F  | 1.018775796  | 1.337498743  | 0.000000000 |
| Tl | 3.260959716  | -0.462698593 | 0.000000000 |
| Ga | -0.767502338 | 2.229470130  | 0.000000000 |

**2 FGa<sub>2</sub>Tl<sub>2</sub><sup>+</sup>**

|    |              |              |             |
|----|--------------|--------------|-------------|
| F  | 0.000000000  | 0.267989000  | 0.000000000 |
| Tl | -2.476715000 | -0.801570000 | 0.000000000 |
| Tl | 2.476715000  | -0.801570000 | 0.000000000 |
| Ga | 1.348381000  | 2.055523000  | 0.000000000 |
| Ga | -1.348381000 | 2.055523000  | 0.000000000 |

**3 FGa<sub>2</sub>Tl<sub>2</sub><sup>+</sup>**

|    |              |              |             |
|----|--------------|--------------|-------------|
| Ga | -2.328602731 | -1.060717976 | 0.000000000 |
| F  | -0.491772575 | 0.229317317  | 0.000000000 |

|    |              |              |             |
|----|--------------|--------------|-------------|
| Ga | 0.240497238  | -1.730217425 | 0.000000000 |
| Tl | -2.444894790 | 2.005928022  | 0.000000000 |
| Tl | 3.298688090  | -0.963271903 | 0.000000000 |

**4 FGa<sub>2</sub>Tl<sub>2</sub><sup>+</sup>**

|    |              |              |             |
|----|--------------|--------------|-------------|
| Ga | -0.876048271 | 2.174493659  | 0.000000000 |
| Ga | 0.366733053  | -0.330207925 | 0.000000000 |
| Tl | 3.620025050  | -0.525918426 | 0.000000000 |
| F  | -2.734713296 | 2.085618191  | 0.000000000 |
| Tl | -3.121245023 | -0.411655191 | 0.000000000 |

**5 FGa<sub>2</sub>Tl<sub>2</sub><sup>+</sup>**

|    |              |              |             |
|----|--------------|--------------|-------------|
| Tl | 3.143011000  | 0.686583000  | 0.000000000 |
| Ga | 0.000000000  | 0.531569000  | 0.000000000 |
| Ga | -0.000100000 | -3.618287000 | 0.000000000 |
| Tl | -3.142984000 | 0.686576000  | 0.000000000 |
| F  | 0.000102000  | -1.726403000 | 0.000000000 |

**6 FGa<sub>2</sub>Tl<sub>2</sub><sup>+</sup>**

|    |              |              |             |
|----|--------------|--------------|-------------|
| Ga | 0.000000000  | 2.168352000  | 0.000000000 |
| F  | 0.000000000  | 0.000000000  | 0.000000000 |
| Tl | 2.587986000  | 0.000000000  | 0.000000000 |
| Tl | -2.587986000 | 0.000000000  | 0.000000000 |
| Ga | 0.000000000  | -2.168352000 | 0.000000000 |

**7 FGa<sub>2</sub>Tl<sub>2</sub><sup>+</sup>**

|    |              |             |             |
|----|--------------|-------------|-------------|
| Ga | -3.192904000 | 1.654700000 | 0.000000000 |
| Tl | 3.184931000  | 0.000000000 | 0.000000000 |
| Tl | -0.261346000 | 0.000000000 | 0.000000000 |

|    |              |              |             |
|----|--------------|--------------|-------------|
| Ga | -3.192904000 | -1.654700000 | 0.000000000 |
| F  | -4.316707000 | 0.000000000  | 0.000000000 |

**8 FGa<sub>2</sub>Tl<sub>2</sub><sup>+</sup>**

|    |              |              |             |
|----|--------------|--------------|-------------|
| Ga | 0.950307175  | -1.357179298 | 0.000000000 |
| F  | 2.227033046  | 0.355008181  | 0.000000000 |
| Tl | 0.266148698  | 1.917083200  | 0.000000000 |
| Tl | -2.330512443 | -0.989100898 | 0.000000000 |
| Ga | 3.797117879  | -1.170616207 | 0.000000000 |

**9 FGa<sub>2</sub>Tl<sub>2</sub><sup>+</sup>**

|    |              |              |             |
|----|--------------|--------------|-------------|
| F  | -0.351007061 | 1.074232265  | 0.000000000 |
| Ga | 0.187452340  | -1.063095045 | 0.000000000 |
| Ga | -1.488757440 | 2.723592473  | 0.000000000 |
| Tl | 3.274002899  | -0.377518721 | 0.000000000 |
| Tl | -2.736971388 | -0.377339732 | 0.000000000 |

**10 FGa<sub>2</sub>Tl<sub>2</sub><sup>+</sup>**

|    |              |              |              |
|----|--------------|--------------|--------------|
| Ga | -1.803281084 | -0.984876260 | 0.000000001  |
| Ga | -0.969867909 | 1.371402483  | -0.000000001 |
| Tl | 0.426779353  | -0.092206833 | 2.559249000  |
| F  | 0.851837636  | 0.587338402  | 0.000000000  |
| Tl | 0.426779352  | -0.092206833 | -2.559249000 |

**11 FGa<sub>2</sub>Tl<sub>2</sub><sup>+</sup>**

|    |              |              |             |
|----|--------------|--------------|-------------|
| Tl | 2.631502543  | -1.288476742 | 0.000000000 |
| Tl | -1.425701246 | 1.983580241  | 0.000000000 |
| F  | 0.668467308  | 0.583834045  | 0.000000000 |
| Ga | -3.365215810 | -1.139617835 | 0.000000000 |
| Ga | -0.404904866 | -1.088438396 | 0.000000000 |

**12 FGa<sub>2</sub>Tl<sub>2</sub><sup>+</sup>**

|    |              |              |             |
|----|--------------|--------------|-------------|
| F  | 0.343214356  | 1.455752703  | 0.000000000 |
| Tl | -0.596591000 | -1.033325923 | 0.000000000 |
| Ga | -3.764915555 | 0.134108973  | 0.000000000 |
| Ga | -1.494604310 | 2.025363398  | 0.000000000 |
| Tl | 2.571358494  | 0.045111556  | 0.000000000 |

**13 FGa<sub>2</sub>Tl<sub>2</sub><sup>+</sup>**

|    |              |              |             |
|----|--------------|--------------|-------------|
| Tl | 0.814763607  | -1.163603021 | 0.000000000 |
| Tl | -2.604708053 | 0.146703946  | 0.000000000 |
| Ga | 0.271325200  | 2.229278134  | 0.000000000 |
| F  | 2.048757604  | 1.283258820  | 0.000000000 |
| Ga | 3.810825350  | 0.055221279  | 0.000000000 |

**Molecular coordinates Figure S9****1 FIn<sub>3</sub>Ga<sup>+</sup>**

|    |              |              |             |
|----|--------------|--------------|-------------|
| In | -2.485003000 | 0.352878000  | 0.000000000 |
| F  | 0.000000000  | 0.188516000  | 0.000000000 |
| In | 0.000000000  | -2.238554000 | 0.000000000 |
| Ga | 0.000000000  | 2.368078000  | 0.000000000 |
| In | 2.485003000  | 0.352878000  | 0.000000000 |

**2 FIn<sub>3</sub>Ga<sup>+</sup>**

|    |              |              |             |
|----|--------------|--------------|-------------|
| Ga | -0.200282471 | -1.030363992 | 0.000000000 |
| F  | -1.301410853 | 0.756257478  | 0.000000000 |
| In | 3.049633008  | -0.733578310 | 0.000000000 |
| In | -3.231009959 | -0.935937035 | 0.000000000 |
| In | 0.547119768  | 2.182473817  | 0.000000000 |

**3 FIn<sub>3</sub>Ga<sup>+</sup>**

|    |              |              |              |
|----|--------------|--------------|--------------|
| In | -0.101080811 | -1.131985442 | 0.081345887  |
| In | 3.205631050  | 0.046583130  | 0.136698705  |
| F  | -1.174388715 | 1.130826176  | -0.137052615 |
| In | -3.259769476 | -0.380043656 | -0.113801516 |
| Ga | 0.586297656  | 1.988046938  | -0.124981959 |

**4 FIn<sub>3</sub>Ga<sup>+</sup>**

|    |              |              |              |
|----|--------------|--------------|--------------|
| Ga | -0.190482905 | -1.587357834 | -0.000000001 |
| In | -1.344708082 | 0.567863160  | -1.439480000 |
| In | 2.540325931  | 0.163728527  | 0.000000000  |
| In | -1.344708082 | 0.567863159  | 1.439480000  |
| F  | 1.592778689  | -2.100331590 | -0.000000001 |

**5 FIn<sub>3</sub>Ga<sup>+</sup>**

|    |              |              |              |
|----|--------------|--------------|--------------|
| In | -0.501710310 | -1.350620373 | 0.125569859  |
| In | 2.879483351  | -0.515037099 | 0.395931220  |
| Ga | -3.443079931 | -0.550288085 | -0.315911649 |
| In | 0.127798928  | 2.076763966  | -0.266032614 |
| F  | -1.781949531 | 0.746076233  | -0.302743310 |

**6 FIn<sub>3</sub>Ga<sup>+</sup>**

|    |              |              |             |
|----|--------------|--------------|-------------|
| In | -1.984493000 | 1.831311000  | 0.000000000 |
| Ga | 0.821486000  | 0.000000000  | 0.000000000 |
| In | 4.036643000  | 0.000000000  | 0.000000000 |
| In | -1.984493000 | -1.831311000 | 0.000000000 |
| F  | -3.197916000 | 0.000000000  | 0.000000000 |

**7 FIn<sub>3</sub>Ga<sup>+</sup>**

|    |             |              |             |
|----|-------------|--------------|-------------|
| In | 0.252236975 | -1.301935572 | 0.000000000 |
|----|-------------|--------------|-------------|

|    |              |              |             |
|----|--------------|--------------|-------------|
| In | -2.962797783 | -0.755600881 | 0.000000000 |
| Ga | 3.397917102  | -0.300180148 | 0.000000000 |
| F  | -1.060401332 | 0.742501006  | 0.000000000 |
| In | 0.755625445  | 2.111068467  | 0.000000000 |

**Molecular coordinates Figure S10**

**1 FGaTl<sub>3</sub><sup>+</sup>**

|    |              |              |             |
|----|--------------|--------------|-------------|
| Ga | -0.311481714 | -0.958642143 | 0.000000000 |
| F  | -1.347355692 | 0.784279161  | 0.000000000 |
| Tl | 0.687601247  | 2.195143499  | 0.000000000 |
| Tl | 2.963491857  | -0.972903640 | 0.000000000 |
| Tl | -3.382178367 | -0.942494364 | 0.000000000 |

**2 FGaTl<sub>3</sub><sup>+</sup>**

|    |              |              |             |
|----|--------------|--------------|-------------|
| Tl | -0.105120722 | -1.000156856 | 0.000000000 |
| Tl | -3.307482109 | -0.083856352 | 0.000000000 |
| F  | -1.119763344 | 1.428040095  | 0.000000000 |
| Tl | 3.281927883  | 0.100433306  | 0.000000000 |
| Ga | 0.666533702  | 2.155406800  | 0.000000000 |

**3 FGaTl<sub>3</sub><sup>+</sup>**

|    |              |              |             |
|----|--------------|--------------|-------------|
| Tl | 2.571900000  | 0.548197000  | 0.000000000 |
| Tl | -2.571900000 | 0.548197000  | 0.000000000 |
| Ga | 0.000000000  | 2.517122000  | 0.000000000 |
| F  | 0.000000000  | 0.407580000  | 0.000000000 |
| Tl | 0.000000000  | -2.105023000 | 0.000000000 |

**4 FGaTl<sub>3</sub><sup>+</sup>**

|    |             |             |             |
|----|-------------|-------------|-------------|
| F  | 0.277874000 | 0.000000000 | 0.000000000 |
| Ga | 1.486649000 | 1.793288000 | 0.000000000 |

|    |              |              |             |
|----|--------------|--------------|-------------|
| Tl | -1.747449000 | -1.515280000 | 0.000000000 |
| Tl | 2.671172000  | -1.081211000 | 0.000000000 |
| Tl | -1.523562000 | 1.910171000  | 0.000000000 |

**5 FGaTl<sub>3</sub><sup>+</sup>**

|    |              |              |             |
|----|--------------|--------------|-------------|
| Tl | -2.908609021 | -0.587735026 | 0.000000000 |
| F  | -2.524686485 | 2.001782065  | 0.000000000 |
| Tl | 0.479501783  | -0.613734295 | 0.000000000 |
| Ga | -3.104676088 | 3.779182614  | 0.000000000 |
| Tl | 3.897837511  | -0.467305307 | 0.000000000 |

**6 FGaTl<sub>3</sub><sup>+</sup>**

|    |              |              |             |
|----|--------------|--------------|-------------|
| Ga | -1.452914023 | 2.563274212  | 0.000000000 |
| Tl | 0.379820938  | -0.138243516 | 0.000000000 |
| Tl | -3.258856165 | -0.481530383 | 0.000000000 |
| Tl | 3.795831420  | -0.582785045 | 0.000000000 |
| F  | -3.246692315 | 1.993976679  | 0.000000000 |

**7 FGaTl<sub>3</sub><sup>+</sup>**

|    |              |              |             |
|----|--------------|--------------|-------------|
| Ga | -2.131164739 | -1.319916557 | 0.000000000 |
| Tl | 0.761423050  | -1.360071794 | 0.000000000 |
| F  | -1.116611969 | 0.473973660  | 0.000000000 |
| Tl | -3.482179828 | 1.439658953  | 0.000000000 |
| Tl | 3.660455833  | 0.372901849  | 0.000000000 |

**8 FGaTl<sub>3</sub><sup>+</sup>**

|    |              |              |             |
|----|--------------|--------------|-------------|
| Tl | -0.098580213 | 2.068026063  | 0.000000000 |
| Tl | 2.707634434  | -0.573081592 | 0.000000000 |
| Tl | -0.857474500 | -1.485189400 | 0.000000000 |

|    |              |              |             |
|----|--------------|--------------|-------------|
| Ga | -3.918971840 | -0.268866340 | 0.000000000 |
| F  | -2.265539015 | 0.838299320  | 0.000000000 |

**9 FGaTl<sub>3</sub><sup>+</sup>**

|    |              |              |              |
|----|--------------|--------------|--------------|
| Ga | 0.284715802  | -2.152051591 | 0.000000000  |
| Tl | 1.159152344  | 0.358998094  | -1.824536000 |
| Tl | -2.267295992 | 0.209985090  | 0.000000000  |
| Tl | 1.159152344  | 0.358998094  | 1.824536000  |
| F  | -1.583276116 | -2.204435279 | 0.000000000  |

**Molecular coordinates Figure S11**

**1 FIn<sub>2</sub>Tl<sub>2</sub><sup>+</sup>**

|    |              |              |             |
|----|--------------|--------------|-------------|
| F  | 0.000000000  | 0.000000000  | 0.000000000 |
| In | 0.000000000  | 2.377876000  | 0.000000000 |
| Tl | 2.588298000  | 0.000000000  | 0.000000000 |
| Tl | -2.588298000 | 0.000000000  | 0.000000000 |
| In | 0.000000000  | -2.377876000 | 0.000000000 |

**2 FIn<sub>2</sub>Tl<sub>2</sub><sup>+</sup>**

|    |              |              |             |
|----|--------------|--------------|-------------|
| F  | 0.000000000  | 0.211361000  | 0.000000000 |
| Tl | -2.079342000 | -1.258605000 | 0.000000000 |
| In | 1.575584000  | 2.061140000  | 0.000000000 |
| Tl | 2.079342000  | -1.258605000 | 0.000000000 |
| In | -1.575584000 | 2.061140000  | 0.000000000 |

**3 FIn<sub>2</sub>Tl<sub>2</sub><sup>+</sup>**

|    |              |              |             |
|----|--------------|--------------|-------------|
| Tl | 3.273663178  | -0.326868512 | 0.000000000 |
| In | 0.619812829  | 2.248007923  | 0.000000000 |
| In | -0.186305220 | -1.056589405 | 0.000000000 |



|    |              |              |             |
|----|--------------|--------------|-------------|
| F  | -1.265762295 | 1.088001503  | 0.000000000 |
| Tl | -3.395268049 | -0.514755178 | 0.000000000 |

#### **4 FIn<sub>2</sub>Tl<sub>2</sub><sup>+</sup>**

|    |              |              |             |
|----|--------------|--------------|-------------|
| Tl | -0.616805341 | -1.112746293 | 0.000000000 |
| Tl | 2.892895796  | -0.430864648 | 0.000000000 |
| F  | -1.713566679 | 1.249469457  | 0.000000000 |
| In | 0.287278553  | 2.272699297  | 0.000000000 |
| In | -3.735057840 | 0.049491193  | 0.000000000 |

#### **5 FIn<sub>2</sub>Tl<sub>2</sub><sup>+</sup>**

|    |              |              |             |
|----|--------------|--------------|-------------|
| Tl | 2.790302368  | -0.788149177 | 0.000000000 |
| In | -0.635133968 | -1.362049189 | 0.000000000 |
| Tl | 0.094379106  | 2.008549074  | 0.000000000 |
| In | -3.785305499 | -0.767661693 | 0.000000000 |
| F  | -1.895295197 | 0.611497959  | 0.000000000 |

#### **6 FIn<sub>2</sub>Tl<sub>2</sub><sup>+</sup>**

|    |              |              |             |
|----|--------------|--------------|-------------|
| Tl | 0.235533591  | -1.108098422 | 0.000000000 |
| In | 3.677375407  | -0.331048874 | 0.000000000 |
| F  | -0.884575995 | 1.191957439  | 0.000000000 |
| Tl | -2.995748170 | -0.193866516 | 0.000000000 |
| In | 1.047901296  | 2.264345308  | 0.000000000 |

#### **7 FIn<sub>2</sub>Tl<sub>2</sub><sup>+</sup>**

|    |              |              |             |
|----|--------------|--------------|-------------|
| F  | 0.512081502  | 1.049922670  | 0.000000000 |
| Tl | 2.650694221  | -0.563412572 | 0.000000000 |
| In | -0.393827244 | -1.143098915 | 0.000000000 |

|    |              |              |             |
|----|--------------|--------------|-------------|
| In | 2.000564796  | 2.737136640  | 0.000000000 |
| Tl | -3.679568574 | -0.517539370 | 0.000000000 |

**8 FIn<sub>2</sub>Tl<sub>2</sub><sup>+</sup>**

|    |              |              |             |
|----|--------------|--------------|-------------|
| F  | 0.557163374  | 0.557163374  | 0.000000000 |
| Tl | 2.253538705  | 2.386108498  | 0.000000000 |
| In | -0.366455261 | -1.590643775 | 0.000000000 |
| In | 2.560797814  | -0.876503403 | 0.000000000 |
| Tl | -3.642887564 | -0.955543799 | 0.000000000 |

**9 FIn<sub>2</sub>Tl<sub>2</sub><sup>+</sup>**

|    |              |              |             |
|----|--------------|--------------|-------------|
| Tl | 0.998081289  | 2.062667246  | 0.000000000 |
| In | 3.558185950  | -0.950399407 | 0.000000000 |
| F  | -1.009373894 | 0.706771209  | 0.000000000 |
| Tl | -3.105796171 | -0.755458654 | 0.000000000 |
| In | 0.111391162  | -1.340310817 | 0.000000000 |

**10 FIn<sub>2</sub>Tl<sub>2</sub><sup>+</sup>**

|    |              |              |             |
|----|--------------|--------------|-------------|
| In | -2.861995000 | -1.842784000 | 0.000000000 |
| Tl | 0.237060000  | 0.000000000  | 0.000000000 |
| In | -2.861995000 | 1.842784000  | 0.000000000 |
| Tl | 3.677095000  | 0.000000000  | 0.000000000 |
| F  | -4.063449000 | 0.000000000  | 0.000000000 |

**11 FIn<sub>2</sub>Tl<sub>2</sub><sup>+</sup>**

|    |              |              |             |
|----|--------------|--------------|-------------|
| Tl | -0.306124184 | -1.440201052 | 0.000000000 |
| F  | -1.495181291 | 0.844368140  | 0.000000000 |
| In | -3.468710773 | -0.324325775 | 0.000000000 |

|    |             |              |             |
|----|-------------|--------------|-------------|
| Tl | 0.623700428 | 2.015913946  | 0.000000000 |
| In | 3.218362878 | -0.782452737 | 0.000000000 |

**12 FIn<sub>2</sub>Tl<sub>2</sub><sup>+</sup>**

|    |              |              |             |
|----|--------------|--------------|-------------|
| In | 2.812327372  | -0.816548733 | 0.000000000 |
| In | 2.702574603  | 2.475358096  | 0.000000000 |
| Tl | -0.232010288 | -1.315795729 | 0.000000000 |
| F  | 1.064446549  | 0.913284642  | 0.000000000 |
| Tl | -3.222436651 | 0.210842422  | 0.000000000 |

**13 FIn<sub>2</sub>Tl<sub>2</sub><sup>+</sup>**

|    |              |              |             |
|----|--------------|--------------|-------------|
| In | -2.976011446 | -0.761937384 | 0.000000000 |
| Tl | 0.412932274  | -0.885536119 | 0.000000000 |
| F  | -2.727431290 | 1.596500383  | 0.000000000 |
| In | -3.543859560 | 3.555292450  | 0.000000000 |
| Tl | 3.834235438  | -0.981659980 | 0.000000000 |

**14 FIn<sub>2</sub>Tl<sub>2</sub><sup>+</sup>**

|    |              |              |             |
|----|--------------|--------------|-------------|
| F  | -0.195340016 | 0.536692285  | 0.000000000 |
| In | -1.235235685 | -1.564610016 | 0.000000000 |
| Tl | 1.819245463  | -1.149863670 | 0.000000000 |
| Tl | 1.537712127  | 2.229375304  | 0.000000000 |
| In | -4.278143182 | -0.318464930 | 0.000000000 |

**15 FIn<sub>2</sub>Tl<sub>2</sub><sup>+</sup>**

|    |              |              |             |
|----|--------------|--------------|-------------|
| Tl | 2.198963274  | -0.723096520 | 0.000000000 |
| Tl | -0.940836468 | -1.055489928 | 0.000000000 |
| In | 1.951387804  | 2.702273940  | 0.000000000 |

|    |              |             |             |
|----|--------------|-------------|-------------|
| In | -4.097411313 | 0.021100105 | 0.000000000 |
| F  | 0.360765341  | 1.180010258 | 0.000000000 |

### Molecular coordinates Figure S12

#### 1 FIn<sub>3</sub>Tl<sup>+</sup>

|    |              |              |             |
|----|--------------|--------------|-------------|
| F  | 0.000000000  | -0.350347000 | 0.000000000 |
| Tl | 0.000000000  | 2.212917000  | 0.000000000 |
| In | -2.392751000 | -0.416627000 | 0.000000000 |
| In | 0.000000000  | -2.760485000 | 0.000000000 |
| In | 2.392751000  | -0.416627000 | 0.000000000 |

#### 2 FIn<sub>3</sub>Tl<sup>+</sup>

|    |              |              |             |
|----|--------------|--------------|-------------|
| Tl | 2.799033017  | -0.534176603 | 0.000000000 |
| In | 0.171149718  | 2.190362007  | 0.000000000 |
| In | -0.675320000 | -1.169688551 | 0.000000000 |
| F  | -1.768885453 | 1.014862523  | 0.000000000 |
| In | -3.797904801 | -0.324050078 | 0.000000000 |

#### 3 FIn<sub>3</sub>Tl<sup>+</sup>

|    |              |              |             |
|----|--------------|--------------|-------------|
| F  | -0.801775392 | 1.013808675  | 0.000000000 |
| In | 0.242840231  | -1.142473463 | 0.000000000 |
| In | 3.687990440  | -0.496513687 | 0.000000000 |
| In | 1.117496525  | 2.163863194  | 0.000000000 |
| Tl | -2.964839746 | -0.430163959 | 0.000000000 |

#### 4 FIn<sub>3</sub>Tl<sup>+</sup>

|    |              |              |             |
|----|--------------|--------------|-------------|
| F  | 1.054733220  | 0.633747656  | 0.000000000 |
| In | 2.928896189  | 1.958163889  | 0.000000000 |
| In | -0.360736506 | -1.295173106 | 0.000000000 |

|    |              |              |             |
|----|--------------|--------------|-------------|
| In | 2.677123783  | -1.295894418 | 0.000000000 |
| Tl | -3.290265234 | 0.312450239  | 0.000000000 |

### 5 FIn<sub>3</sub>Tl<sup>+</sup>

|    |              |              |             |
|----|--------------|--------------|-------------|
| In | -2.794647000 | -1.845819000 | 0.000000000 |
| In | 0.254157000  | 0.000000000  | 0.000000000 |
| Tl | 3.670793000  | 0.000000000  | 0.000000000 |
| In | -2.794647000 | 1.845819000  | 0.000000000 |
| F  | -3.990278000 | 0.000000000  | 0.000000000 |

### 6 FIn<sub>3</sub>Tl<sup>+</sup>

|    |              |              |             |
|----|--------------|--------------|-------------|
| F  | 0.120149282  | 0.330107440  | 0.000000000 |
| Tl | 2.163895474  | 1.759459554  | 0.000000000 |
| In | -1.258000290 | -1.561023816 | 0.000000000 |
| In | 1.756697187  | -1.511547278 | 0.000000000 |
| In | -4.097817155 | 0.103445540  | 0.000000000 |

### 7 FIn<sub>3</sub>Tl<sup>+</sup>

|    |              |              |             |
|----|--------------|--------------|-------------|
| Tl | 0.494843422  | 1.924175897  | 0.000000000 |
| In | -0.268501064 | -1.522745201 | 0.000000000 |
| F  | -1.501844665 | 0.516732923  | 0.000000000 |
| In | -3.445099956 | -0.864524744 | 0.000000000 |
| In | 3.171443577  | -0.888421517 | 0.000000000 |

### 8 FIn<sub>3</sub>Tl<sup>+</sup>

|    |              |              |             |
|----|--------------|--------------|-------------|
| In | 1.215649634  | 1.938682741  | 0.000000000 |
| Tl | -0.509985712 | -1.093667890 | 0.000000000 |
| F  | -0.976245574 | 1.468254192  | 0.000000000 |

|    |              |              |             |
|----|--------------|--------------|-------------|
| In | -3.247867805 | 0.828786044  | 0.000000000 |
| In | 3.054566638  | -1.229247568 | 0.000000000 |

### 9 FIn<sub>3</sub>Tl<sup>+</sup>

|    |              |              |             |
|----|--------------|--------------|-------------|
| F  | 0.827336303  | 0.887209564  | 0.000000000 |
| In | 2.248478924  | -1.113462525 | 0.000000000 |
| Tl | -0.840963585 | -1.102502404 | 0.000000000 |
| In | 2.691759190  | 2.156354228  | 0.000000000 |
| In | -3.702033205 | 0.616655899  | 0.000000000 |

### 10 FIn<sub>3</sub>Tl<sup>+</sup>

|    |              |              |              |
|----|--------------|--------------|--------------|
| In | 0.640720678  | 1.177178729  | -1.422213000 |
| In | 2.639046945  | -1.415199735 | 0.000000000  |
| Tl | -2.228483220 | -0.431620768 | 0.000000000  |
| In | 0.640720678  | 1.177178729  | 1.422213000  |
| F  | 0.331703253  | -1.023342232 | -0.000000001 |

## Molecular coordinates Figure S13

### 1 FInTl<sub>3</sub><sup>+</sup>

|    |              |              |             |
|----|--------------|--------------|-------------|
| Tl | 0.000000000  | -2.252043000 | 0.000000000 |
| Tl | 2.563609000  | 0.318154000  | 0.000000000 |
| In | 0.000000000  | 2.621386000  | 0.000000000 |
| Tl | -2.563609000 | 0.318154000  | 0.000000000 |
| F  | 0.000000000  | 0.269631000  | 0.000000000 |

### 2 FInTl<sub>3</sub><sup>+</sup>

|    |              |              |             |
|----|--------------|--------------|-------------|
| In | 1.258291252  | 1.997008262  | 0.000000000 |
| F  | -0.895793135 | 1.540628424  | 0.000000000 |
| Tl | 3.100061531  | -1.166644081 | 0.000000000 |

|    |              |              |             |
|----|--------------|--------------|-------------|
| Tl | -3.301874107 | 0.773534450  | 0.000000000 |
| Tl | -0.459843746 | -0.986138096 | 0.000000000 |

### 3 FInTl<sub>3</sub><sup>+</sup>

|    |              |              |             |
|----|--------------|--------------|-------------|
| Tl | 3.197183529  | -0.826953572 | 0.000000000 |
| In | -0.285338715 | -1.235937760 | 0.000000000 |
| Tl | 0.614787600  | 2.169576999  | 0.000000000 |
| Tl | -3.484809520 | -0.686656383 | 0.000000000 |
| F  | -1.390943924 | 0.825294548  | 0.000000000 |

### 4 FInTl<sub>3</sub><sup>+</sup>

|    |              |              |             |
|----|--------------|--------------|-------------|
| Tl | -0.549618673 | -1.360353952 | 0.000000000 |
| Tl | 2.931866619  | -0.551340022 | 0.000000000 |
| Tl | 0.116196118  | 2.137205214  | 0.000000000 |
| F  | -1.911829641 | 0.801818307  | 0.000000000 |
| In | -3.778928398 | -0.520055978 | 0.000000000 |

### 5 FInTl<sub>3</sub><sup>+</sup>

|    |              |              |              |
|----|--------------|--------------|--------------|
| In | 0.323138449  | 1.863975548  | 0.000000000  |
| Tl | 1.891459094  | -0.599059795 | -0.000000001 |
| Tl | -0.988060042 | -0.214350841 | 2.518615000  |
| F  | -1.040961170 | -0.184944037 | 0.000000000  |
| Tl | -0.988060043 | -0.214350841 | -2.518614999 |

### 6 FInTl<sub>3</sub><sup>+</sup>

|    |              |              |             |
|----|--------------|--------------|-------------|
| Tl | -3.031400262 | -0.521396313 | 0.000000000 |
| F  | -1.279330642 | 1.476224736  | 0.000000000 |
| Tl | 0.193990367  | -1.100174042 | 0.000000000 |

|    |              |              |             |
|----|--------------|--------------|-------------|
| In | -1.057249768 | 3.578037941  | 0.000000000 |
| Tl | 3.619128756  | -0.706947000 | 0.000000000 |

### 7 FInTl<sub>3</sub><sup>+</sup>

|    |              |              |             |
|----|--------------|--------------|-------------|
| In | 3.565484900  | -0.825866760 | 0.000000000 |
| Tl | 0.068538907  | -1.307800246 | 0.000000000 |
| Tl | 1.023117731  | 2.112379788  | 0.000000000 |
| Tl | -3.131016910 | -0.410941946 | 0.000000000 |
| F  | -1.057846483 | 0.953641525  | 0.000000000 |

### 8 FInTl<sub>3</sub><sup>+</sup>

|    |              |              |             |
|----|--------------|--------------|-------------|
| In | -2.320090917 | -1.327167024 | 0.000000000 |
| Tl | 0.737111280  | -1.414073203 | 0.000000000 |
| F  | -0.875612329 | 0.568629295  | 0.000000000 |
| Tl | -2.906602294 | 1.927286029  | 0.000000000 |
| Tl | 3.670292268  | 0.226460267  | 0.000000000 |

### 9 FInTl<sub>3</sub><sup>+</sup>

|    |              |              |             |
|----|--------------|--------------|-------------|
| In | -2.289038747 | 2.219668862  | 0.000000000 |
| Tl | 0.572147251  | 0.019979822  | 0.000000000 |
| Tl | -2.775473612 | -1.545556143 | 0.000000000 |
| Tl | 4.000459083  | 0.113809338  | 0.000000000 |
| F  | -3.711647938 | 0.621037674  | 0.000000000 |

## Molecular coordinates Figure S14

### 1 FIn<sub>3</sub>Al<sup>+</sup>

|    |              |              |              |
|----|--------------|--------------|--------------|
| Al | 0.298223862  | -1.756583913 | -0.000000002 |
| In | -1.372548534 | 0.022260239  | 1.413874000  |



|    |              |              |              |
|----|--------------|--------------|--------------|
| In | 2.349555317  | 0.704644380  | 0.000000000  |
| In | -1.372548535 | 0.022260240  | -1.413873999 |
| F  | 1.968735942  | -2.036318440 | -0.000000002 |

## 2 FIn<sub>3</sub>Al<sup>+</sup>

|    |              |              |             |
|----|--------------|--------------|-------------|
| Al | -1.029021704 | 2.364856788  | 0.000000000 |
| In | 0.318257760  | -0.267049969 | 0.000000000 |
| F  | -2.745400869 | 2.235038290  | 0.000000000 |
| In | -3.168611142 | -0.298174630 | 0.000000000 |
| In | 3.627616917  | -0.472703914 | 0.000000000 |

## 3 FIn<sub>3</sub>Al<sup>+</sup>

|    |              |              |             |
|----|--------------|--------------|-------------|
| In | 3.243961779  | 0.134741835  | 0.000000000 |
| In | -0.079747156 | -0.911514164 | 0.000000000 |
| Al | 0.797513062  | 2.127768960  | 0.000000000 |
| F  | -0.881918160 | 1.643939920  | 0.000000000 |
| In | -3.213815172 | -0.089685833 | 0.000000000 |

## 4 FIn<sub>3</sub>Al<sup>+</sup>

|    |              |              |             |
|----|--------------|--------------|-------------|
| In | -2.931551836 | -0.436058508 | 0.000000000 |
| In | 0.409320079  | -0.487808675 | 0.000000000 |
| F  | -2.548443743 | 2.138337994  | 0.000000000 |
| Al | -3.009801252 | 3.806973699  | 0.000000000 |
| In | 3.788832006  | -0.478902673 | 0.000000000 |

## 5 FIn<sub>3</sub>Al<sup>+</sup>

|    |              |              |             |
|----|--------------|--------------|-------------|
| In | 1.776015000  | 2.130982000  | 0.000000000 |
| In | 2.118492000  | -1.672323000 | 0.000000000 |
| F  | -0.688914000 | 1.752714000  | 0.000000000 |

|    |              |              |             |
|----|--------------|--------------|-------------|
| In | -3.617125000 | -0.780586000 | 0.000000000 |
| Al | -0.568578000 | 0.000000000  | 0.000000000 |

**6 FIn<sub>3</sub>Al<sup>+</sup>**

|    |              |              |             |
|----|--------------|--------------|-------------|
| F  | 1.154091022  | 1.785663297  | 0.000000000 |
| Al | 2.524994932  | 2.871746369  | 0.000000000 |
| In | -0.254912401 | -0.700366066 | 0.000000000 |
| In | 2.954059281  | -0.447135339 | 0.000000000 |
| In | -3.581018843 | 0.057631162  | 0.000000000 |

**7 FIn<sub>3</sub>Al<sup>+</sup>**

|    |              |              |             |
|----|--------------|--------------|-------------|
| F  | -0.048641881 | 0.555979250  | 0.000000000 |
| In | 1.964117714  | 2.234922694  | 0.000000000 |
| Al | -0.728267900 | -1.118725819 | 0.000000000 |
| In | -3.914434315 | -1.052498505 | 0.000000000 |
| In | 2.152465811  | -0.987737884 | 0.000000000 |

**8 FIn<sub>3</sub>Al<sup>+</sup>**

|    |              |              |             |
|----|--------------|--------------|-------------|
| Al | -1.941447621 | -0.297532193 | 0.000000000 |
| In | 1.097316661  | -0.399390602 | 0.000000000 |
| F  | -2.096274440 | 1.444126573  | 0.000000000 |
| In | -4.699532871 | 0.769731389  | 0.000000000 |
| In | 4.502324591  | -0.556650856 | 0.000000000 |

**9 FIn<sub>3</sub>Al<sup>+</sup>**

|    |             |              |             |
|----|-------------|--------------|-------------|
| Al | 0.000000000 | 2.507937000  | 0.000000000 |
| In | 0.000000000 | -1.886576000 | 0.000000000 |
| F  | 0.000000000 | 0.630109000  | 0.000000000 |

|    |              |             |             |
|----|--------------|-------------|-------------|
| In | 2.580496000  | 0.552735000 | 0.000000000 |
| In | -2.580496000 | 0.552735000 | 0.000000000 |

### 10 FIn<sub>3</sub>Al<sup>+</sup>

|    |              |              |             |
|----|--------------|--------------|-------------|
| In | 2.573437791  | -0.361776598 | 0.000000000 |
| In | -0.814412196 | -1.598373931 | 0.000000000 |
| In | -0.282961413 | 1.947057340  | 0.000000000 |
| Al | -3.882709921 | -0.405854023 | 0.000000000 |
| F  | -2.427990762 | 0.657519023  | 0.000000000 |

### Molecular coordinates Figure S15

#### 1 FTl<sub>3</sub>Al<sup>+</sup>

|    |              |              |              |
|----|--------------|--------------|--------------|
| Tl | -1.343075830 | 0.020194285  | 1.506344000  |
| Tl | 2.475164537  | -0.510162863 | 0.000000000  |
| Tl | -1.343075831 | 0.020194285  | -1.506344000 |
| Al | 0.265357846  | 1.916858249  | 0.000000000  |
| F  | 1.899486190  | 2.346088909  | 0.000000000  |

#### 2 FTl<sub>3</sub>Al<sup>+</sup>

|    |              |              |             |
|----|--------------|--------------|-------------|
| Tl | 2.242115560  | -1.283304608 | 0.000000000 |
| Tl | 1.402807395  | 2.526687087  | 0.000000000 |
| Al | -0.611293956 | 0.053481291  | 0.000000000 |
| Tl | -3.423870538 | -1.443286160 | 0.000000000 |
| F  | -1.106489605 | 1.721882205  | 0.000000000 |

#### 3 FTl<sub>3</sub>Al<sup>+</sup>

|    |              |              |             |
|----|--------------|--------------|-------------|
| Tl | -0.346735040 | -0.743575692 | 0.000000000 |
| Tl | -3.076439182 | 1.135410502  | 0.000000000 |
| Al | 1.546031988  | 1.848365062  | 0.000000000 |

|    |              |              |             |
|----|--------------|--------------|-------------|
| Tl | 3.195741699  | -0.910837150 | 0.000000000 |
| F  | -0.186265879 | 2.001150589  | 0.000000000 |

#### 4 FTI<sub>3</sub>Al<sup>+</sup>

|    |              |              |             |
|----|--------------|--------------|-------------|
| F  | 0.000000000  | 2.498150000  | 0.000000000 |
| Tl | 3.208848000  | 0.815392000  | 0.000000000 |
| Al | 0.000000000  | 0.808781000  | 0.000000000 |
| Tl | -3.208848000 | 0.815392000  | 0.000000000 |
| Tl | 0.000000000  | -2.038160000 | 0.000000000 |

#### 5 FTI<sub>3</sub>Al<sup>+</sup>

|    |              |              |             |
|----|--------------|--------------|-------------|
| Tl | -3.136321077 | -0.316296429 | 0.000000000 |
| F  | -2.676744971 | 2.365829607  | 0.000000000 |
| Tl | 0.251259747  | -0.358836106 | 0.000000000 |
| Al | -3.062478766 | 4.045176187  | 0.000000000 |
| Tl | 3.673986479  | -0.236963247 | 0.000000000 |

#### 6 FTI<sub>3</sub>Al<sup>+</sup>

|    |              |              |              |
|----|--------------|--------------|--------------|
| F  | 1.265364685  | 1.600917264  | 0.090134813  |
| Tl | -1.064975371 | -0.432326446 | -0.087002480 |
| Al | 1.856286552  | -0.002814131 | 0.160857790  |
| Tl | 5.012068732  | -0.203688168 | 0.436711872  |
| Tl | -4.385612114 | 0.458586763  | -0.385541069 |

#### 7 FTI<sub>3</sub>Al<sup>+</sup>

|    |              |              |             |
|----|--------------|--------------|-------------|
| F  | -0.448678235 | 0.259044500  | 0.000000000 |
| Al | 1.341130890  | 0.375468841  | 0.000000000 |
| Tl | -2.772183707 | -1.172393029 | 0.000000000 |

|    |             |              |             |
|----|-------------|--------------|-------------|
| Tl | 0.320876307 | -2.375709933 | 0.000000000 |
| Tl | 2.285916666 | 3.459059808  | 0.000000000 |

**8 FTI<sub>3</sub>Al<sup>+</sup>**

|    |              |              |             |
|----|--------------|--------------|-------------|
| F  | 0.000000000  | 0.745194000  | 0.000000000 |
| Tl | 2.646857000  | 0.670922000  | 0.000000000 |
| Tl | 0.000000000  | -1.841137000 | 0.000000000 |
| Al | 0.000000000  | 2.595073000  | 0.000000000 |
| Tl | -2.646857000 | 0.670922000  | 0.000000000 |

**9 FTI<sub>3</sub>Al<sup>+</sup>**

|    |              |              |             |
|----|--------------|--------------|-------------|
| Tl | -0.940295500 | -1.628639580 | 0.000000000 |
| Tl | 2.474889667  | -0.325513354 | 0.000000000 |
| F  | -2.756110701 | 0.509700234  | 0.000000000 |
| Tl | -0.564177942 | 1.994633140  | 0.000000000 |
| Al | -4.138362805 | -0.605092639 | 0.000000000 |
